# Supplementary material for: Biodereplication of Antiplasmodial Extracts: Application of the Amazonian Medicinal Plant Piper coruscans Kunth
Source: MDPI journal article supplement (doi:10.3390/molecules27217638), 2022-11-07
Supplement: s1 [file s1]

## Table of Content

|                                                                                |      |
|--------------------------------------------------------------------------------|------|
| SI 1. HPLC-DAD chromatogram of alkaloid extract from <i>Cinchona pubescens</i> | S3   |
| SI 2. ESI (+) HRMS spectra of antimalarial drugs with heme-Fe(III)             | S4   |
| SI 3. ESI (+) HRMS spectrum of artemisinin-Fe(II) heme                         | S8   |
| SI 4. Molecular network of ethyl acetate extract from <i>Piper coruscans</i>   | S9   |
| SI 5. Experimental                                                             | S10  |
| SI 6. CPC fractograms of cyclohexane extract from <i>P. coruscans</i>          | S14  |
| SI 7. Proton NMR of known compounds isolated for <i>P. coruscans</i>           | S17  |
| SI 8. 1D and 2D NMR for compound 10                                            | S28  |
| SI 9. NMR spectroscopic data for the isolated compounds                        | S33  |
| SI 10. LCMS of compounds isolated from <i>P. coruscans</i>                     | S36  |
| SI 11. Structure of antimalarial drugs                                         | SI38 |
| SI 12. Structure of alkaloids from <i>Cinchona pubescens</i>                   | SI39 |
| SI 13. Reference                                                               |      |

SI 1. HPLC-DAD (280 nm) chromatogram of alkaloid extract from *Cinchona pubescens*

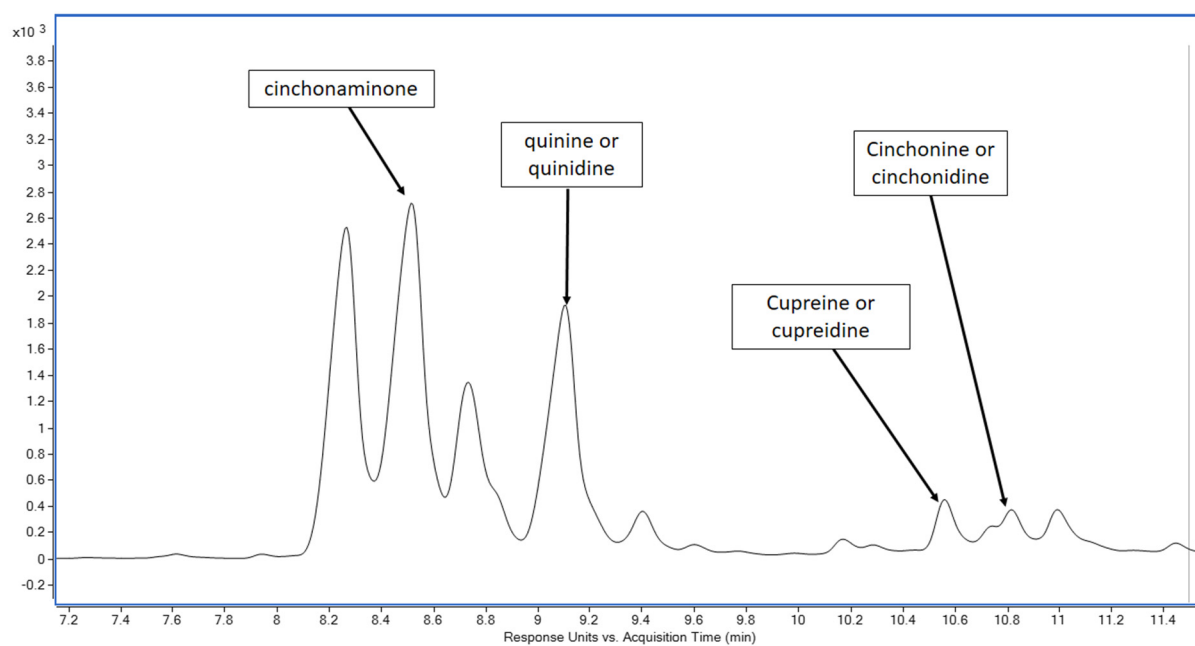

Figure S1 HPLC-DAD (280 nm) chromatogram of alkaloid extract from *Cinchona pubescens*

## SI 2. ESI (+) HRMS spectra of antimalarial drugs with heme-Fe(III)

Figure S2. ESI (+) HRMS spectra of antimalarial drugs with heme-Fe(III)

ESI (+) spectrum of mixture chloroquine diphosphate - heme

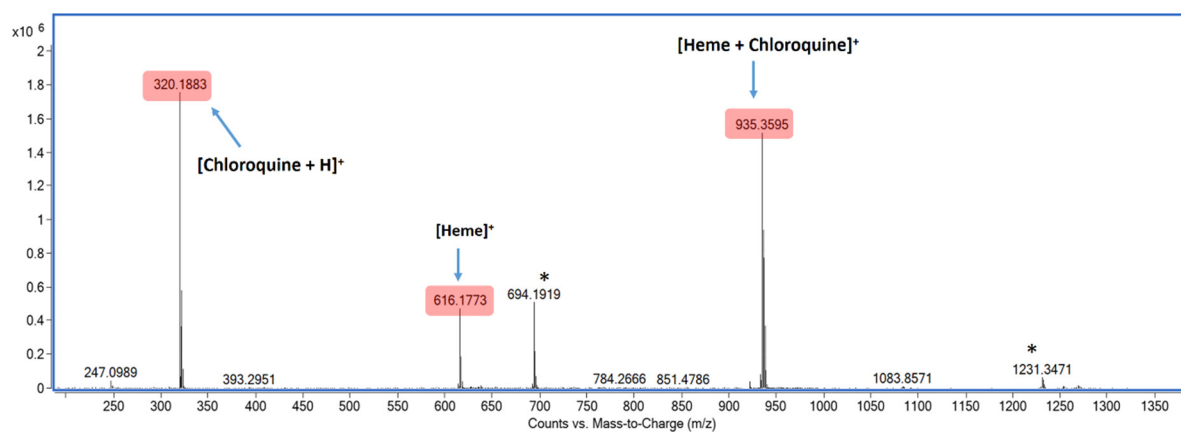

ESI (+) spectrum of mixture quinine - heme

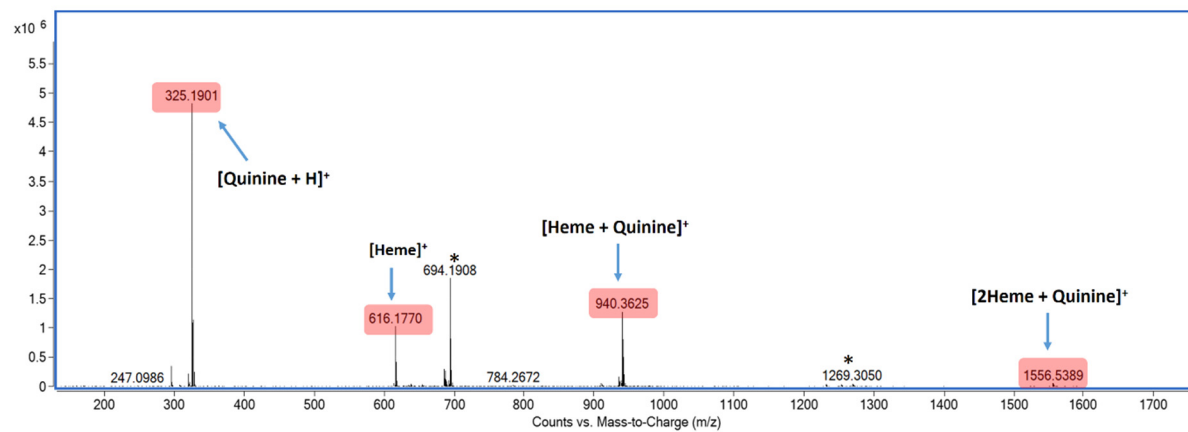

ESI (+) spectrum of mixture amodiaquine - heme

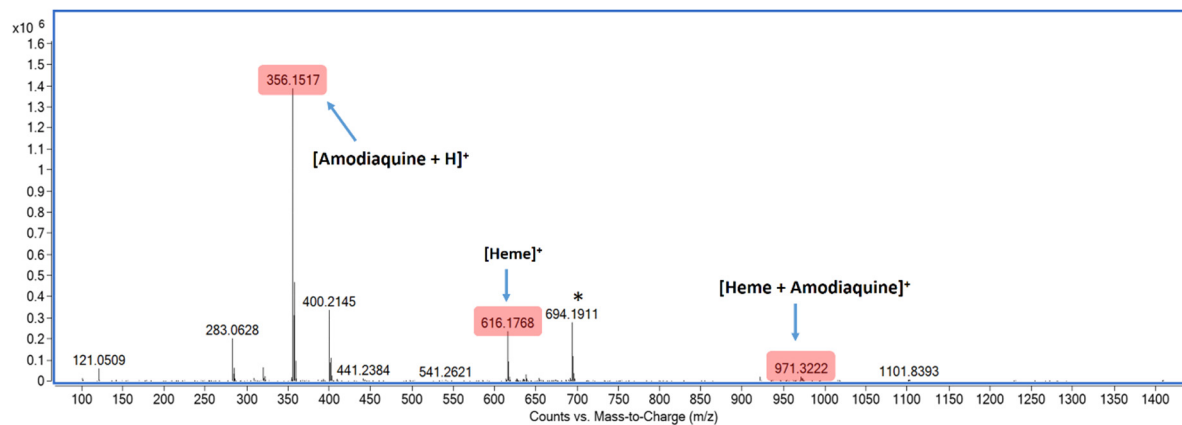

ESI (+) spectrum of mixture ketoconazole - heme

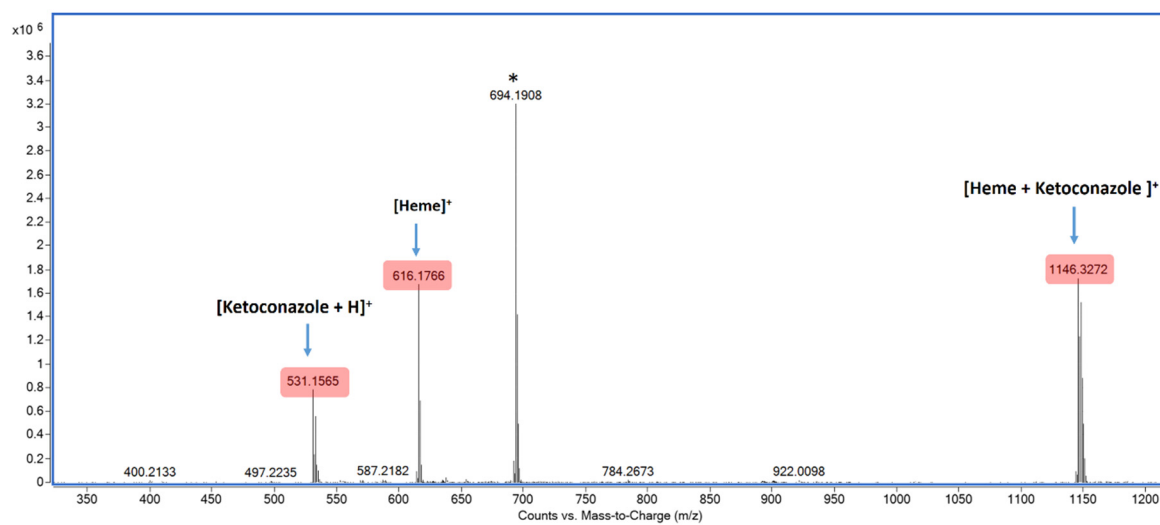

ESI (+) spectrum of mixture mefloquine - heme

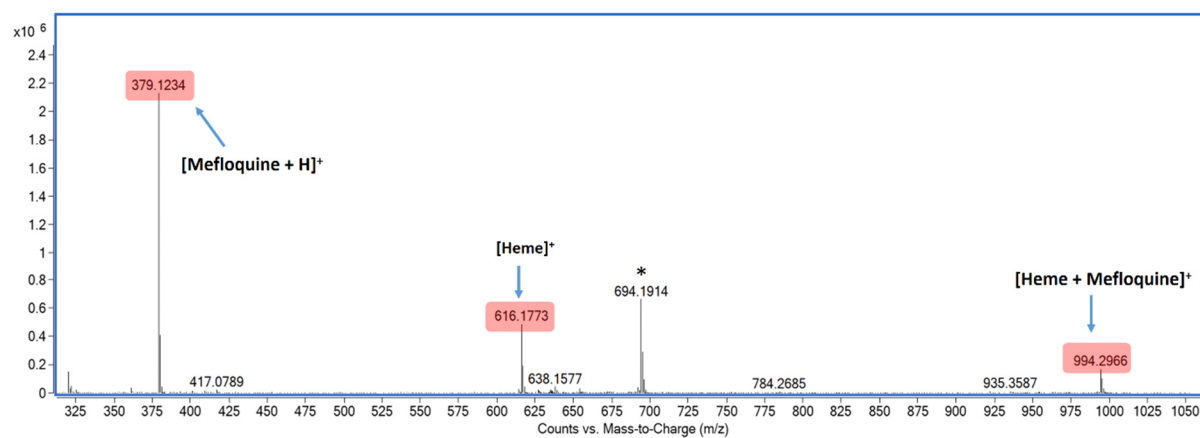

ESI (+) spectrum of sulfadoxine - heme

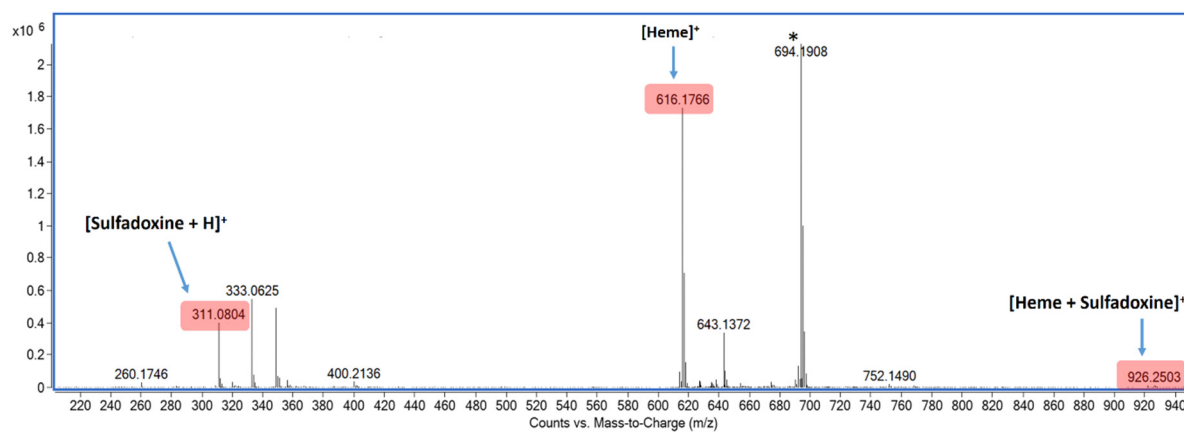

ESI (+) spectrum of mixture praziquantel - heme

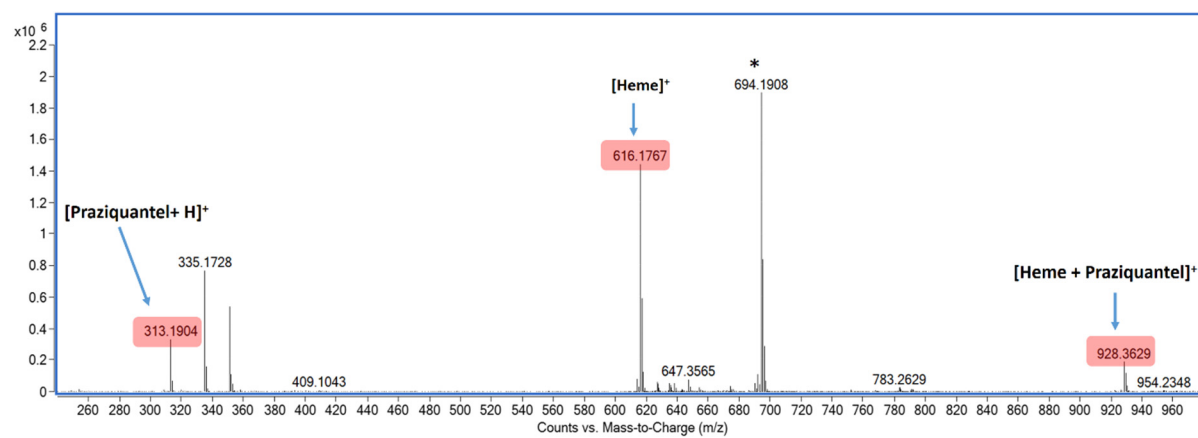

ESI (+) spectrum of mixture miconazole - heme

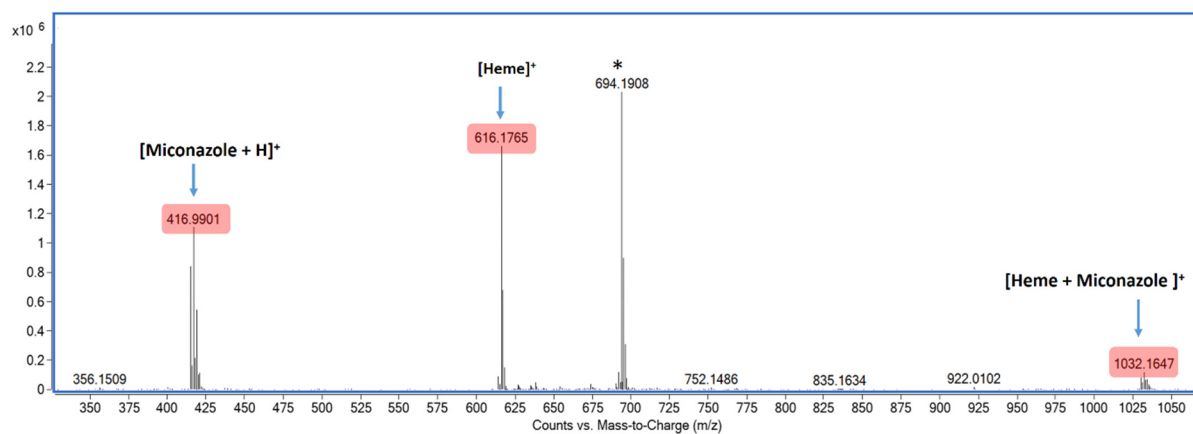

### SI 3. ESI (+) HRMS spectrum of artemisinin - Fe(II) heme

Figure S3. ESI (+) HRMS spectrum of artemisinin - Fe(II) heme

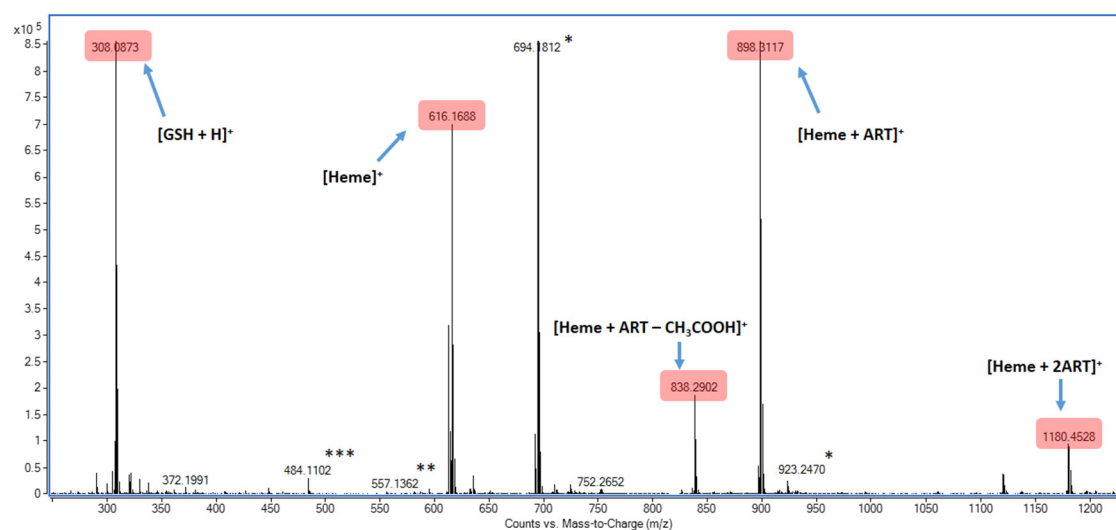

\*Heme adducts with DMSO, GSH or heme dimers ([2heme - H]<sup>+</sup>, [2heme + 37Cl]<sup>+</sup>); \*\* fragment of heme following loss of CH<sub>2</sub>-COOH; \*\*\* fragment GSSG following loss of γ-glutamate.

Figure S4. Molecular network of ethyl acetate extract from *Piper coruscans*

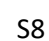



## SI 5. Experimental

### Materials

Antimalarial drugs, reagents and solvents were acquired from Sigma-Aldrich (France) or other providers when specified: chloroquine diphosphate salt, quinine chloride, amodiaquine dihydrochloride dehydrate, miconazole nitrate salt, ketoconazole, sulfadoxine  $\geq 95\%$  (TLC), praziquantel, mefloquine hydrochloride and artemisinin, Tween 20, citric acid, ACS reagent,  $\geq 99.5\%$ , LCMS-grade acetonitrile, LCMS-grade methanol, n-octanol for analysis (Carlo ERBA reagents, France), n-heptane for analyses (Scharlau), ethyl acetate for analyses (VWR chemical), n-butanol for analyses (EMSURE® ACS,ISO), methanol for analyses (EMSURE® ACS,ISO), water Milli-Q. NMR of compounds was carried in deuterated solvents ( $\text{CDCl}_3$ ,  $\text{CD}_3\text{CN}$  or  $\text{MeOD}$ ). Deionized water was obtained from a Milli-Q instrument (Millipore, France).

Extraction of alkaloidic extract from *Cinchona pubescens* Vahl (Rubiaceae) was carried in December 2011 in the Pharmacognosy laboratory at Paris-Saclay University (France), as described in Durango *et al* [1].

Known compounds were identified based on literature spectral data. Aurentiacin (**1**) [2]; stercurensin, (**2**) [3,4]; cardamomin, (**3**) [4,5]; strobopinin 7-methyl ether (**4**) [6]; 5-hydroxy-7-methoxy-6,8-dimethyl flavanone (**5**) [7]; desmethoxymatteucinol (**6**) [8]; alpinetin, (**7**) [4,9]; pinocembrin, (**8**) [10]; dimethyl cryptostrobin, (**9**) [11]; *N*-Benzoyltyramine methyl ether, (**11**) [12,13]; 1*H*-inden-1-one (**12**) [14,15].

### Analyses

$[\alpha]_{\text{D}}$  analyses were carried used Atago™ Polarimetre Polax-2L carried at  $\lambda = 589$  at a temperature of  $16^\circ\text{C}$ . All compounds were yellow pale. For **4**,  $[\alpha]_{\text{D}} + 7.02$  (c 0.02 in MeOH); for **5**,  $[\alpha]_{\text{D}} + 3.34$  (c 0.01 in MeOH); for **6**,  $[\alpha]_{\text{D}} + 3.51$  (c 0.01 in MeOH); for **10**,  $[\alpha]_{\text{D}} + 7.38$  (c 0.02 in MeOH); for **9**,  $[\alpha]_{\text{D}} + 7.02$  (c 0.02 in MeOH); and for **11**,  $[\alpha]_{\text{D}} + 10.03$  (c 0.03 in MeOH).

Positive (+) HRMS  $[\text{M} + \text{H}]^+$  was performed in 6530 Accurate-Mass QToF LC/MS instrument (Agilent Technologies). (+) HRMS  $[\text{M} + \text{H}]^+$  for **1**  $m/z$  299.1228 (calcd for  $\text{C}_{18}\text{H}_{18}\text{O}_4$  298.3153); (+) HRMS  $[\text{M} + \text{H}]^+$  for **2**  $m/z$  285.1101 (calcd for  $\text{C}_{17}\text{H}_{16}\text{O}_4$  284.1115); (+) HRMS  $[\text{M} + \text{H}]^+$  for **3**  $m/z$  271.0943 (calcd for  $\text{C}_{16}\text{H}_{14}\text{O}_4$  271.0930); (+) HRMS  $[\text{M} + \text{H}]^+$  for **4**  $m/z$  285.1109 (calcd for  $\text{C}_{17}\text{H}_{16}\text{O}_4$  284.1063); (+) HRMS  $[\text{M} + \text{H}]^+$  for **5**  $m/z$  299.1274 (calcd for  $\text{C}_{18}\text{H}_{18}\text{O}_4$  298.1253); (+) HRMS  $[\text{M} + \text{H}]^+$  for **6**  $m/z$  285.1101 (calcd for  $\text{C}_{17}\text{H}_{16}\text{O}_4$  284.1115); (+) HRMS  $[\text{M} + \text{H}]^+$  for **7**  $m/z$  271.4951 (calcd for  $\text{C}_{16}\text{H}_{14}\text{O}_4$  271.4958); (+) HRMS  $[\text{M} + \text{H}]^+$  for **8**  $m/z$  285.1088 (calcd for  $\text{C}_{17}\text{H}_{16}\text{O}_4$  284.1117); (+) HRMS  $[\text{M} + \text{H}]^+$  for **9**  $m/z$  299.1270

(calcd for  $C_{18}H_{18}O_4$  298.1271); (+) HRMS  $[M + H]^+$  for **10**  $m/z$  285.1109 (calcd for  $C_{17}H_{16}O_4$  285.1108); (+) HRMS  $[M + H]^+$  for **11**  $m/z$  256.1334 (calcd for  $C_{16}H_{17}NO_2$  255.1342); (+) HRMS  $[M + H]^+$  for **12**  $m/z$  131.0476 (calcd for  $C_9H_6O$  131.0478).

NMR analyses were performed on a NMR Avance Bruker 500 MHz and 600 MHz CryoProbe for all compounds. Results were carried on Bruker TopSpin Software/NMR Data Analysis.

**NMR analyses of compound 10 (ethyl 5-cinnamoyl-4,5-dihydroxy-3-methyl-4,5-dihydrofuran-2-carboxylate):** Compound **10** was obtained as a yellow, amorphous powder; UV (MeOH),  $\lambda_{max}$  = 280 nm. (+) HREMS indicated a  $[M + H]^+$  ion peak at  $m/z$  285.1109, consistent with the molecular formula  $C_{17}H_{16}O_4$ . This product is obtained through the spontaneous fragmentation of compound **10** in the MS source corresponding at  $[C_{17}H_{18}O_6 - H_2O_2]^+$ . Suggested pathway is proposed in Figure 1. NMR analyses accounted for structure **a**. Double-bond equivalent (DBE) value for this structure is 9. Analysis of  $^1H$  NMR spectra and correlating its information with that of  $^{13}C$  NMR spectrum resulted to the identification of two aromatic rings (cinnamoyl and furan moieties). The  $^{13}C$  NMR spectrum ( $CD_3OD$ ) showed 17 signals arising from two carbonyls, four  $sp^2$  quaternary carbons, eight  $sp^2$  methines, one methyl and one carboxylate group (SI4). In the  $^1H$  NMR spectrum, characteristic protons of an  $\alpha$ ,  $\beta$  unsaturated ketone were observed at  $\delta_H$  6.77 (1H, d,  $J$  = 15.93) and 6.23 (1H, d,  $J$  = 15.93), typical signals of a cinnamoyl moiety, corroborated in COSY (Figure 2). Methine proton is observed at  $\delta_H$  3.80 (1H, s) in furan cycle. For the ester group, the methylene proton at  $\delta_H$  4.19, (2H, m) correlated in COSY with methyl proton at  $\delta_H$  1.27 (3H, t,  $J$  = 7.1). In addition, it correlated in HMBC with the quaternary carbons C-6' at  $\delta_C$  171.9 and C-2' at  $\delta_C$  151.3 (Figure 2). Location of the quaternary  $sp^2$  carbon at C-5' in furan cycle was evidenced by HMBC  $J^3$  correlation of H-8 (cinnamoyl moiety) and  $J^2$  correlation with H-4'. Connection between the furan and cinnamoyl moieties was also corroborated by  $J^3$  correlation of H-4' with carbonyl at C-9 ( $\delta_C$  200.8). Location of carbonyl at C-6' in ester group was evidenced by the correlation in HMBC  $J^3$  with H7' and correlations in  $J^4$  of H-4', H-9'. The methyl at  $\delta_H$  1.97 (3H, s) and the carboxylate substitutions were observed in *meta* and *ortho* of the oxygen bridge in the furan cycle respectively.

Figure S5-1. Suggested MS source decomposition pathway for compound 10.

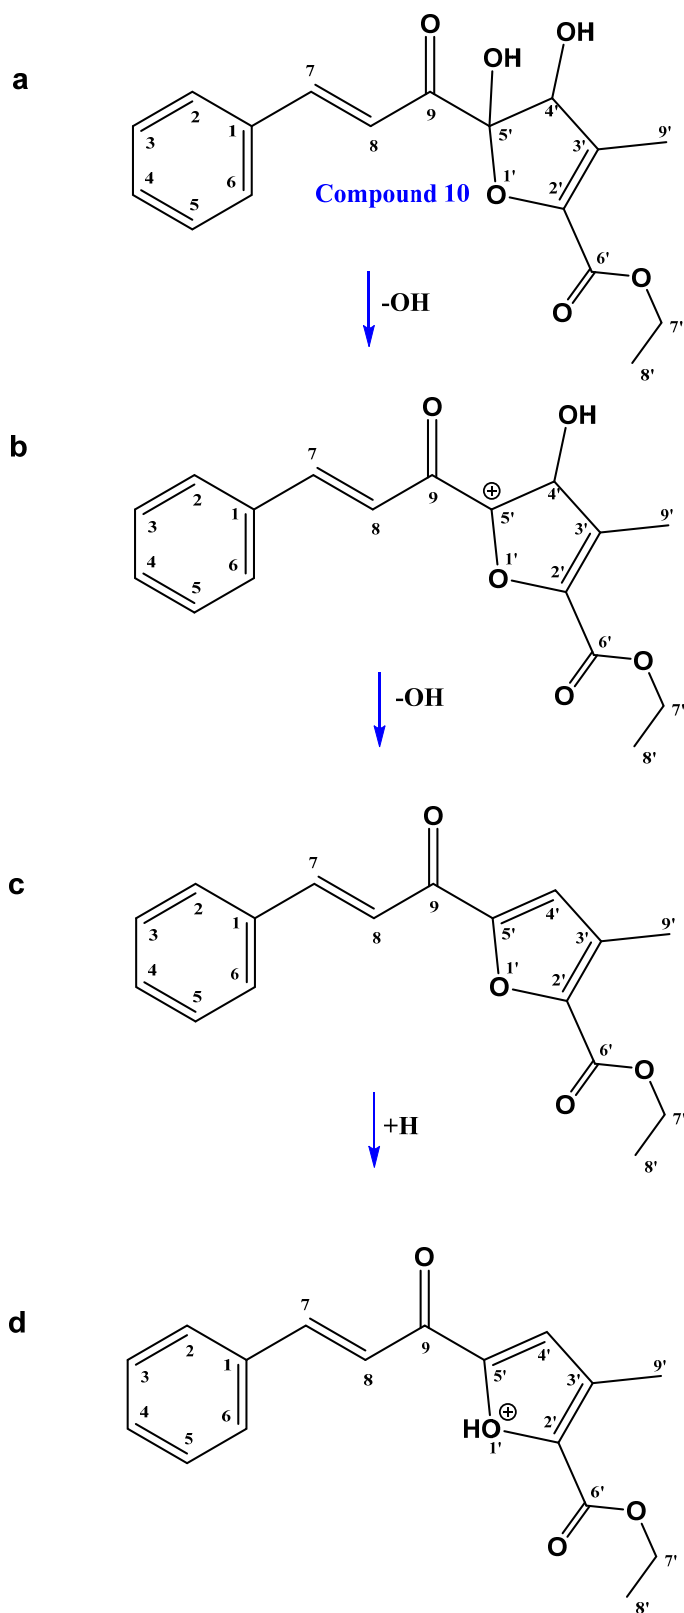

Figure S5-2: Main HMBC and COSY correlations for compound 10.

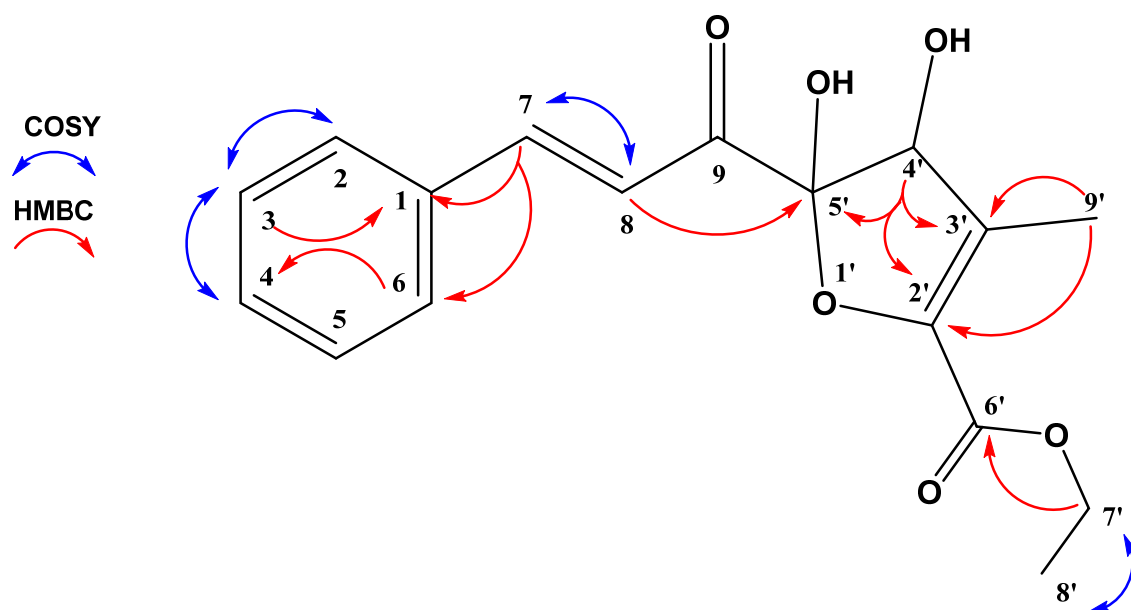

SI 6. CPC fractograms of cyclohexane extract (PCC) from *P. coruscans*

Figure S6. CPC fractograms of cyclohexane extract (PCC) from *P. coruscans*

Total CPC UV fractogram at 280 nm. Fraction volume is 0,5 ml.

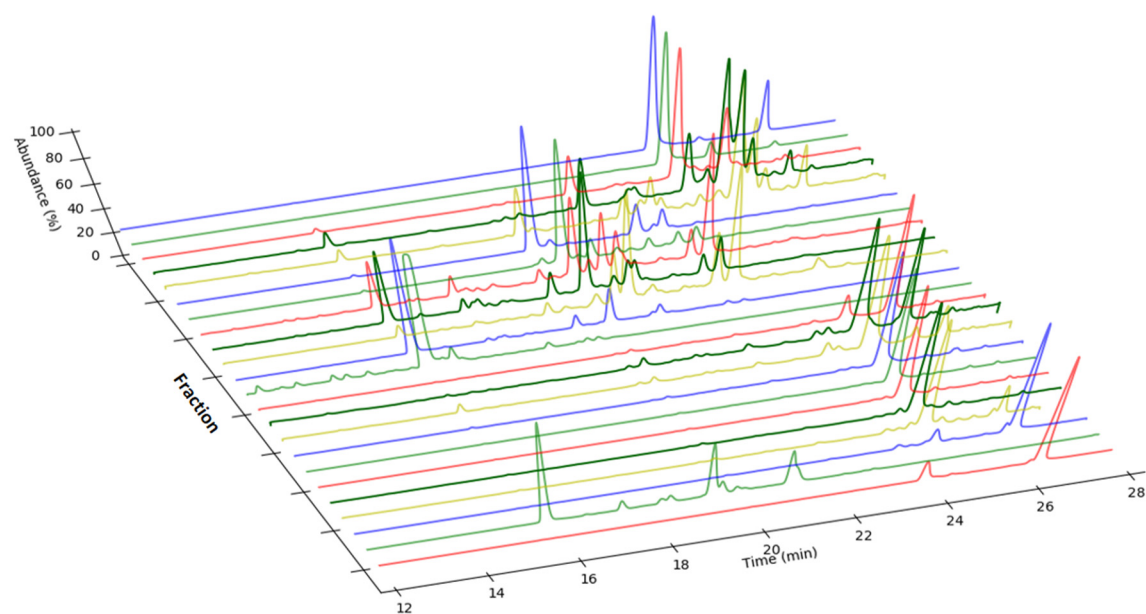

CPC fractogram at  $m/z$  285 (mass of compound 4). Fraction volume is 0,5 ml.

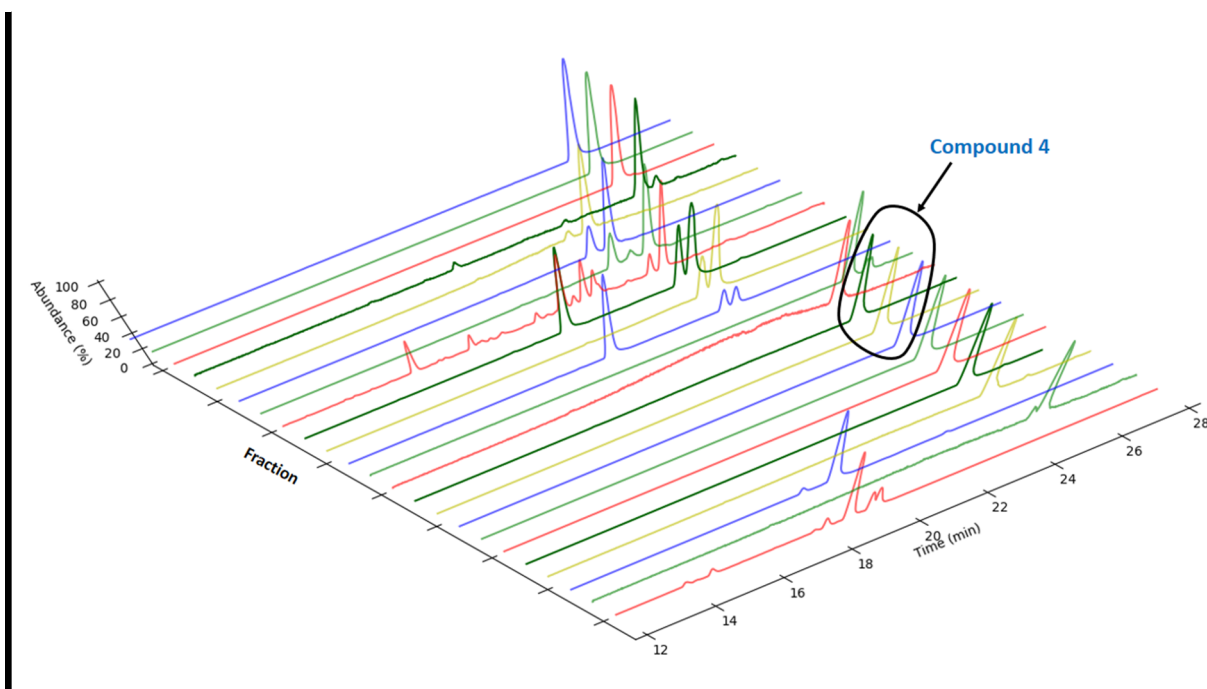

CPC fractogram at  $m/z$  299 (mass of compounds **1** and **5**). Fraction volume is 0,5 ml.

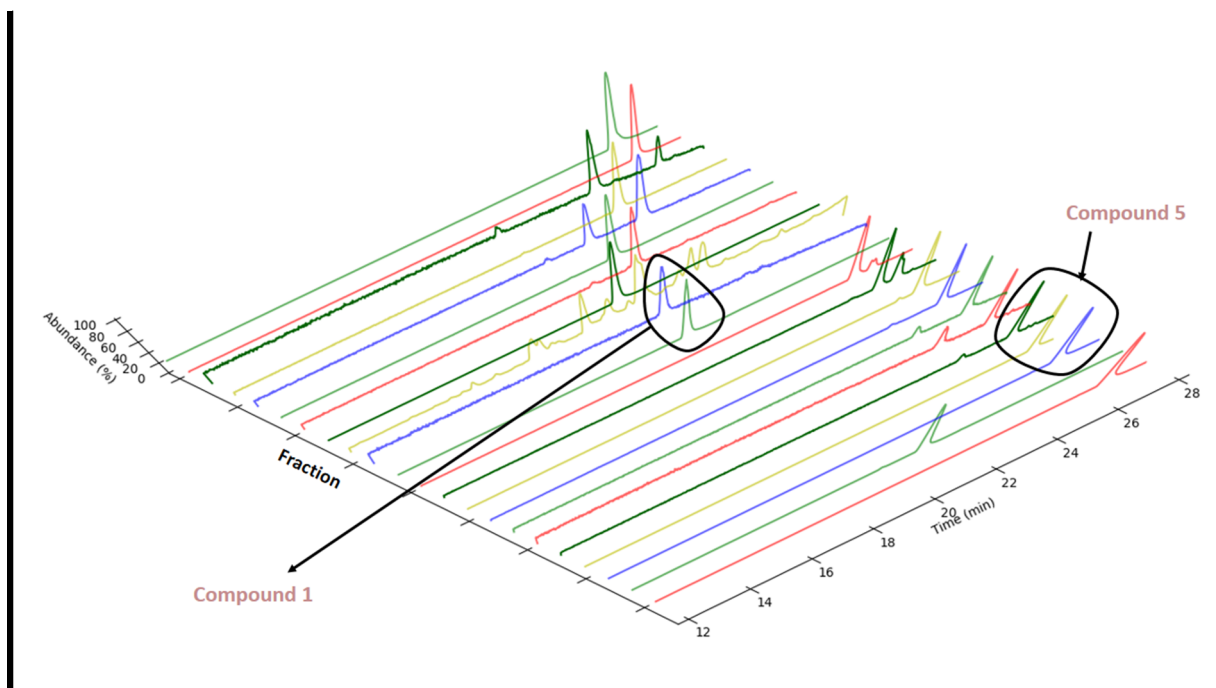

SI 7. Proton NMR of known compounds isolated for *P. coruscans*

Figure S7. Proton NMR of known compounds isolated for *P. coruscans*

$^1\text{H}$  NMR for compound **1** in  $\text{CD}_3\text{CN}$

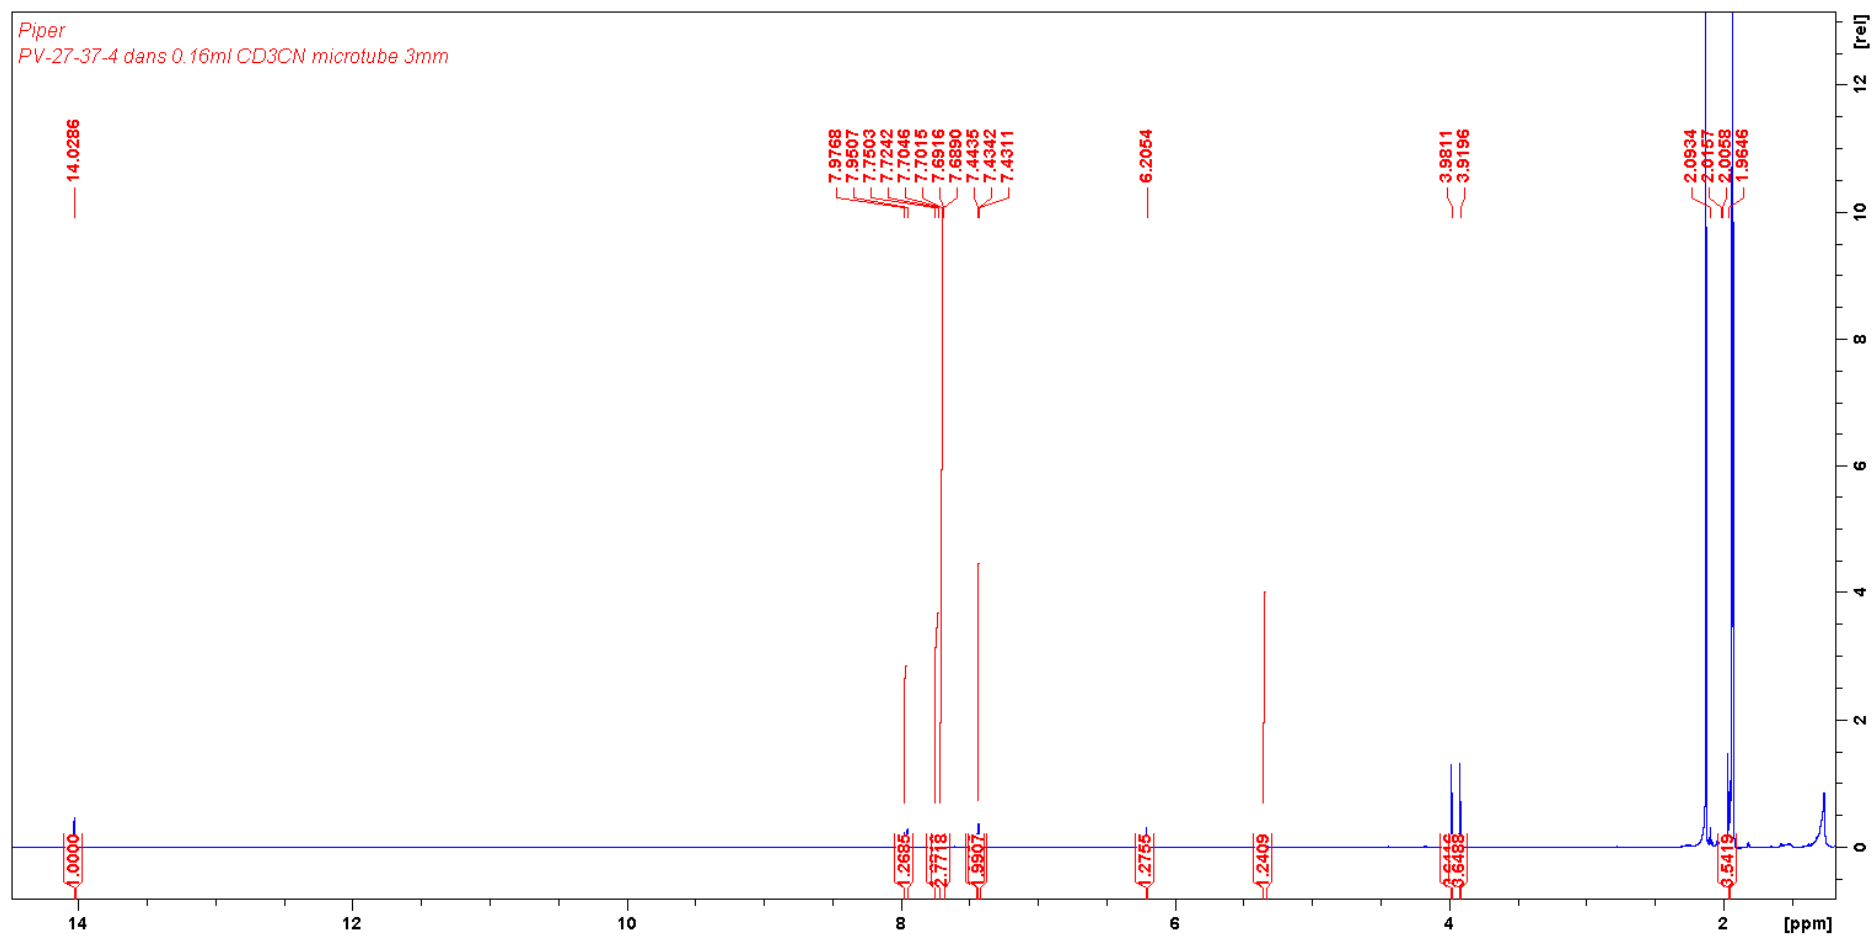



$^1\text{H}$  NMR for compound **2** in  $\text{CDCl}_3$

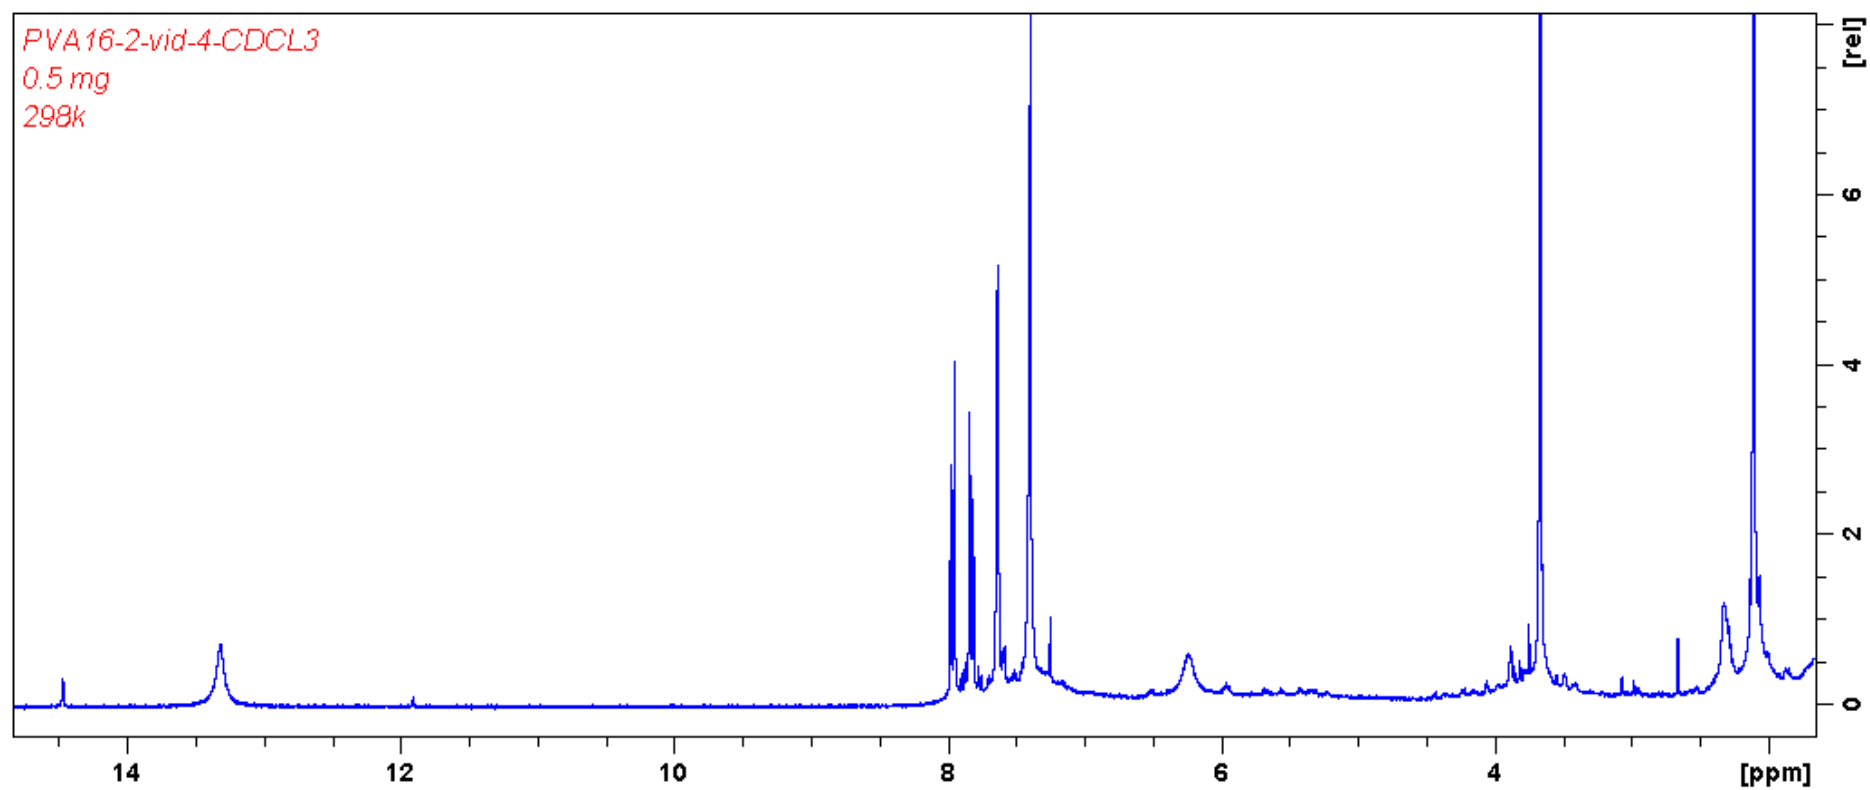

$^1\text{H}$  NMR for compound **3** in  $\text{CDCl}_3$

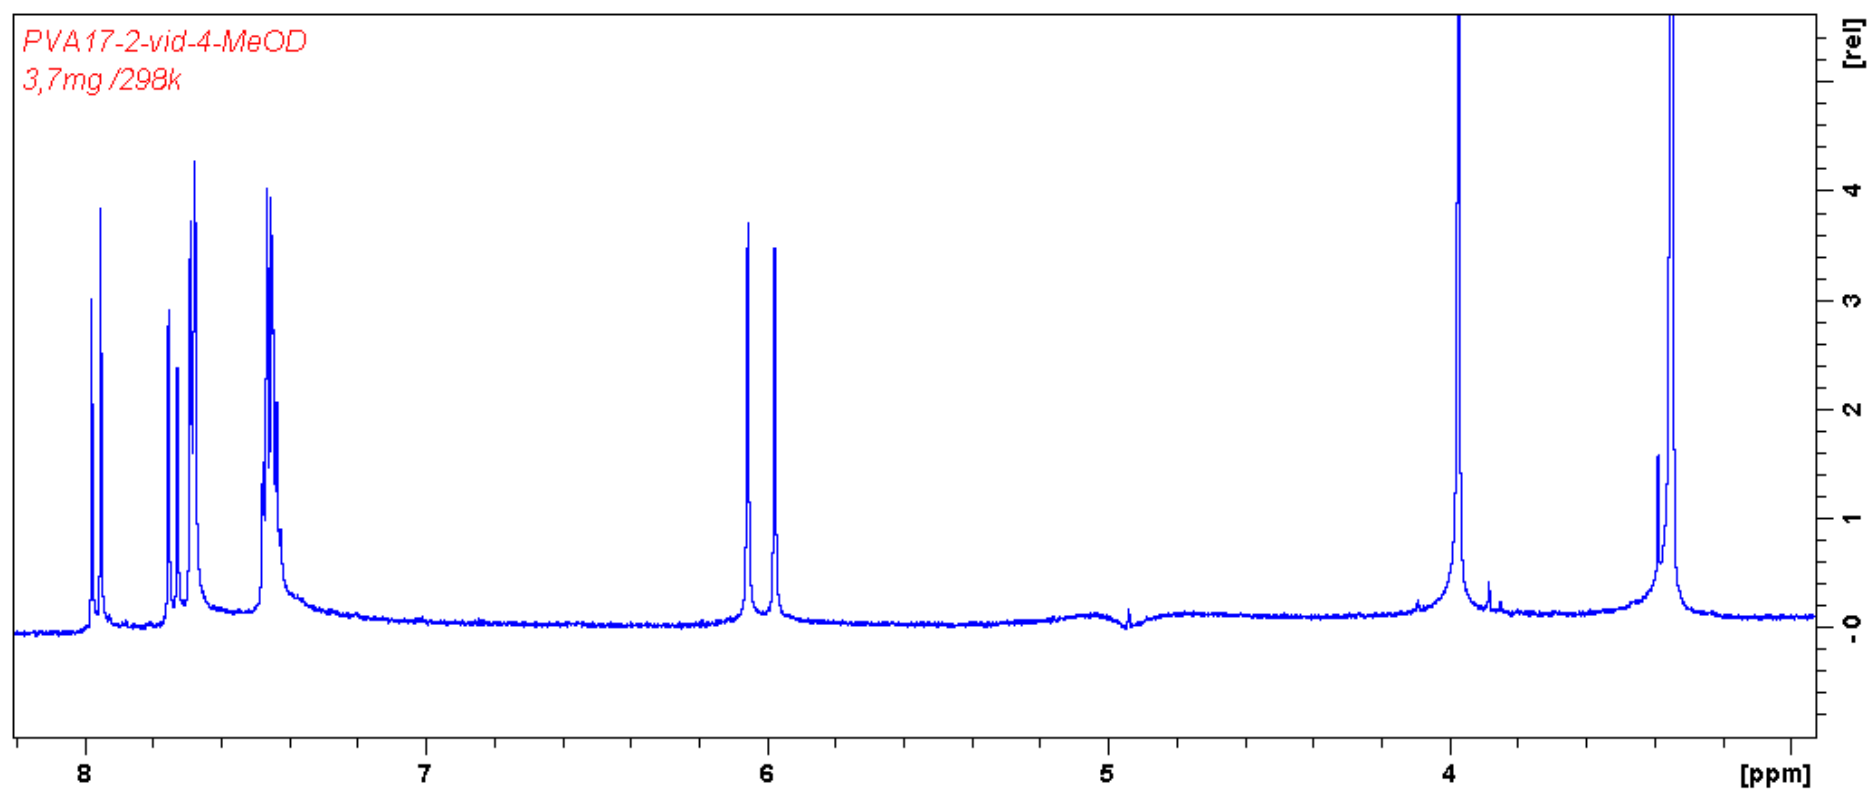

$^1\text{H}$  NMR for compound **4** in  $\text{CD}_3\text{CN}$

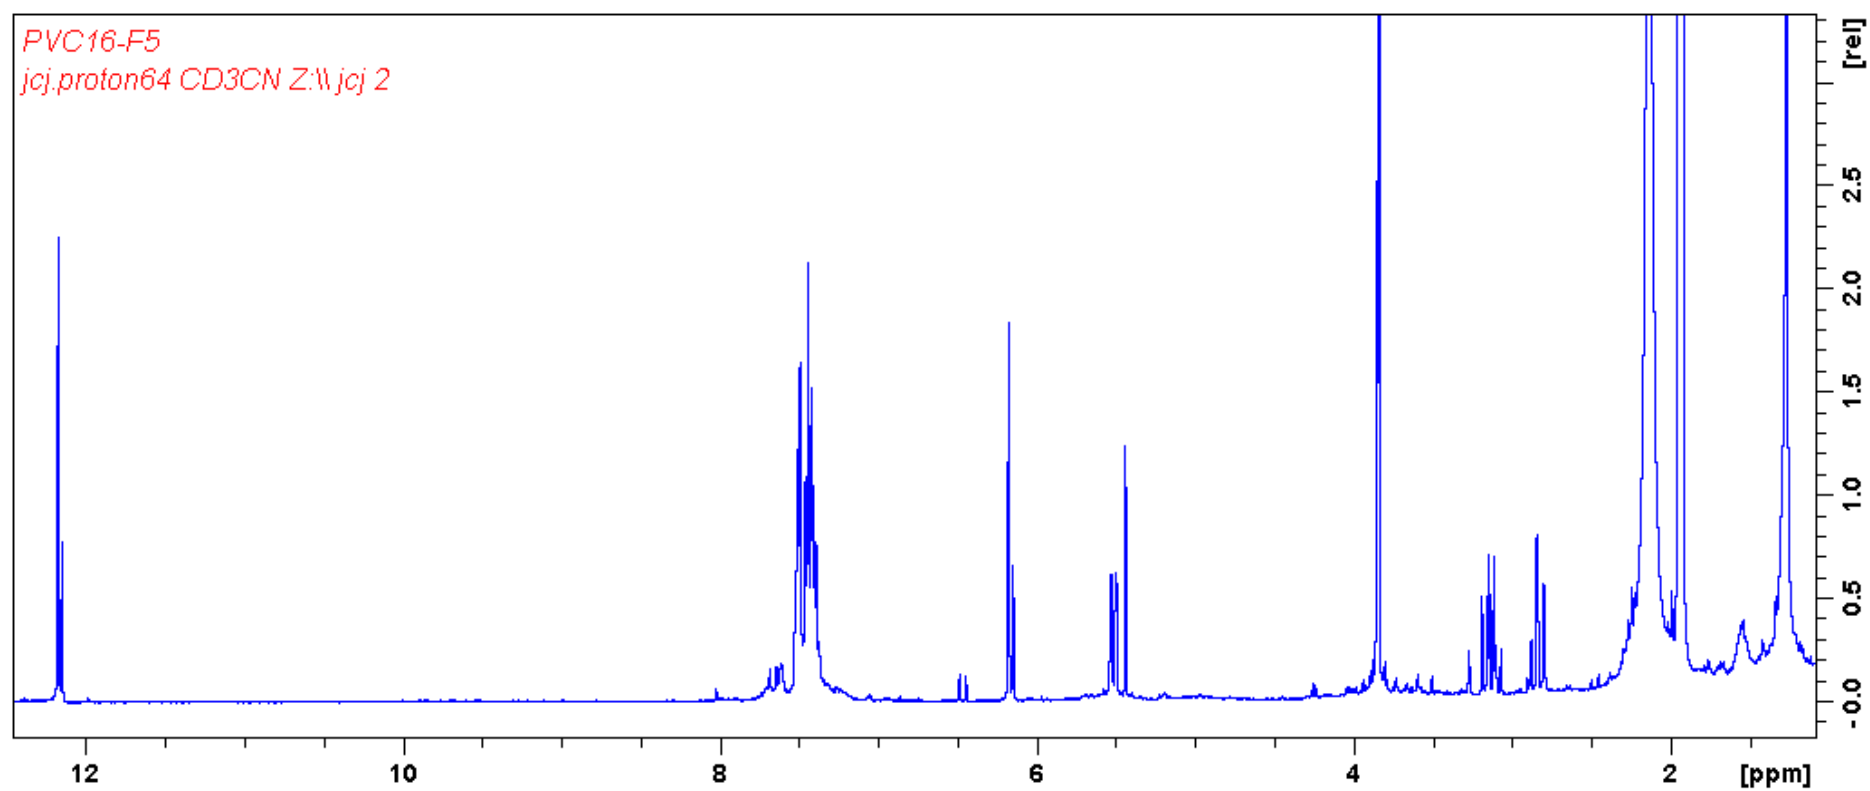

$^1\text{H}$  NMR for compound **5** in  $\text{CD}_3\text{CN}$

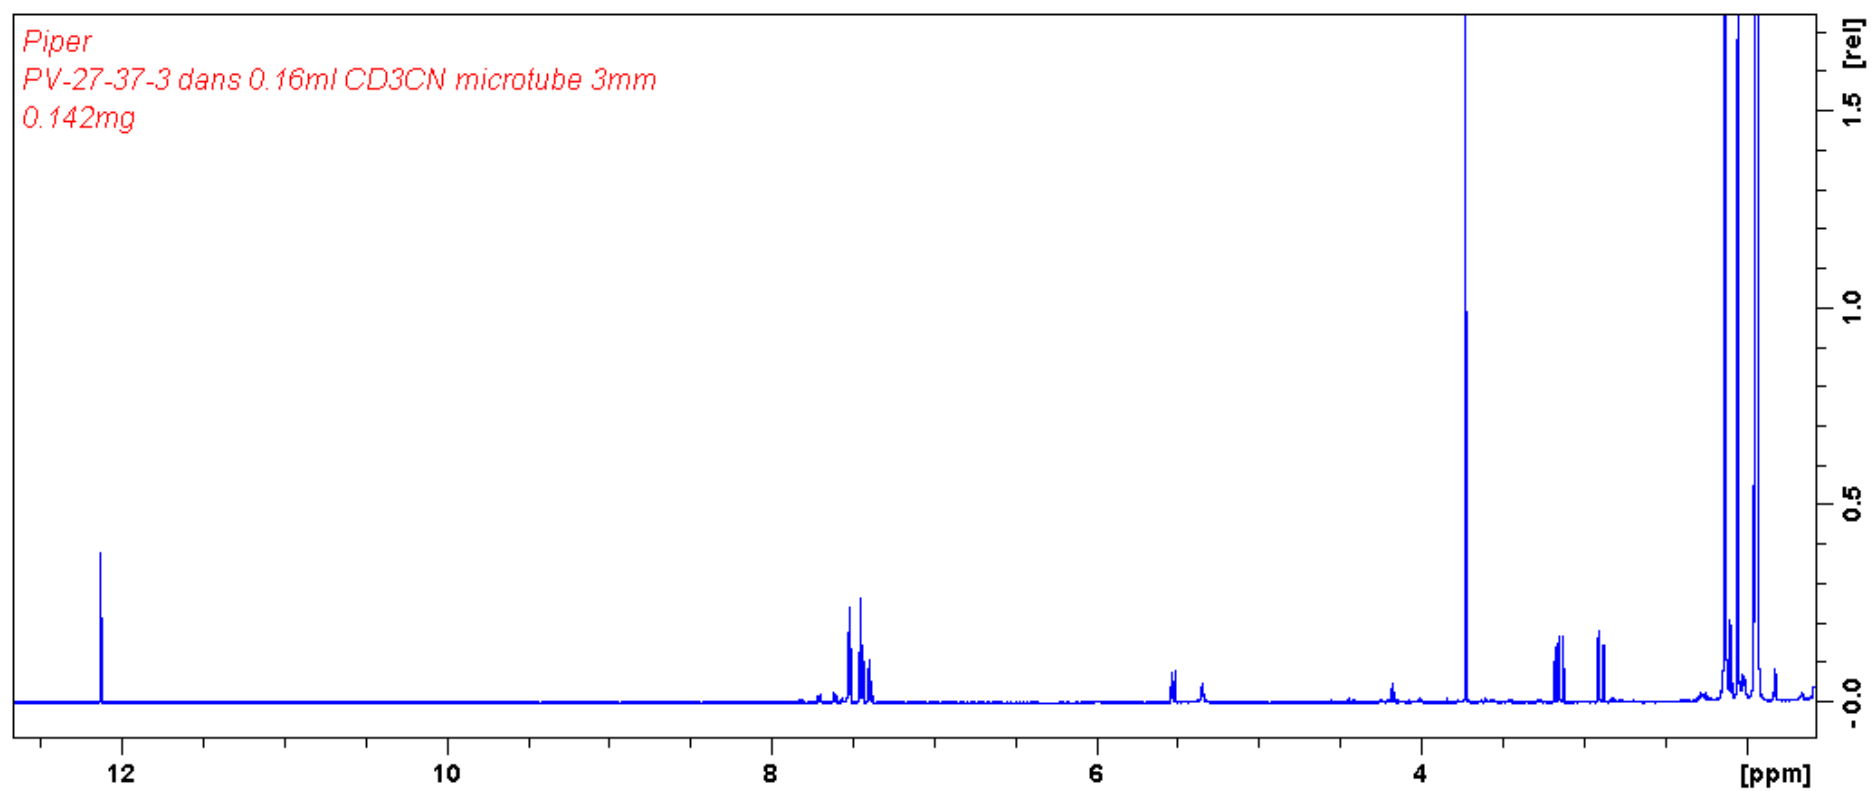

$^1\text{H}$  NMR for compound **6** in  $\text{CDCl}_3$

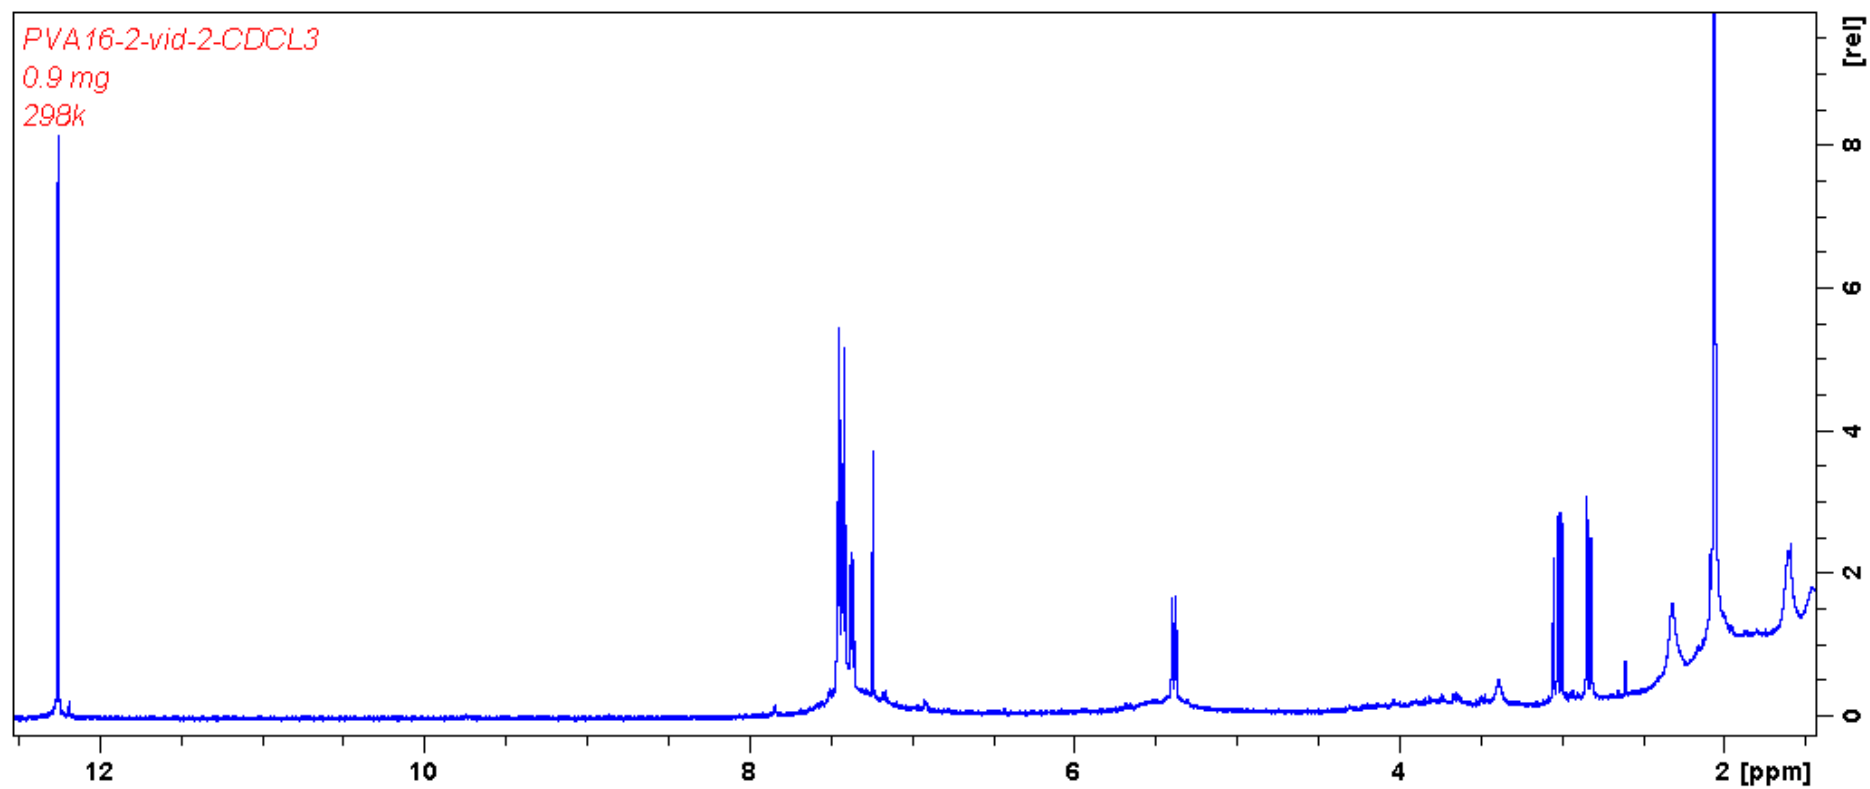

$^1\text{H}$  NMR for compound **7** in  $\text{CD}_3\text{OD}$

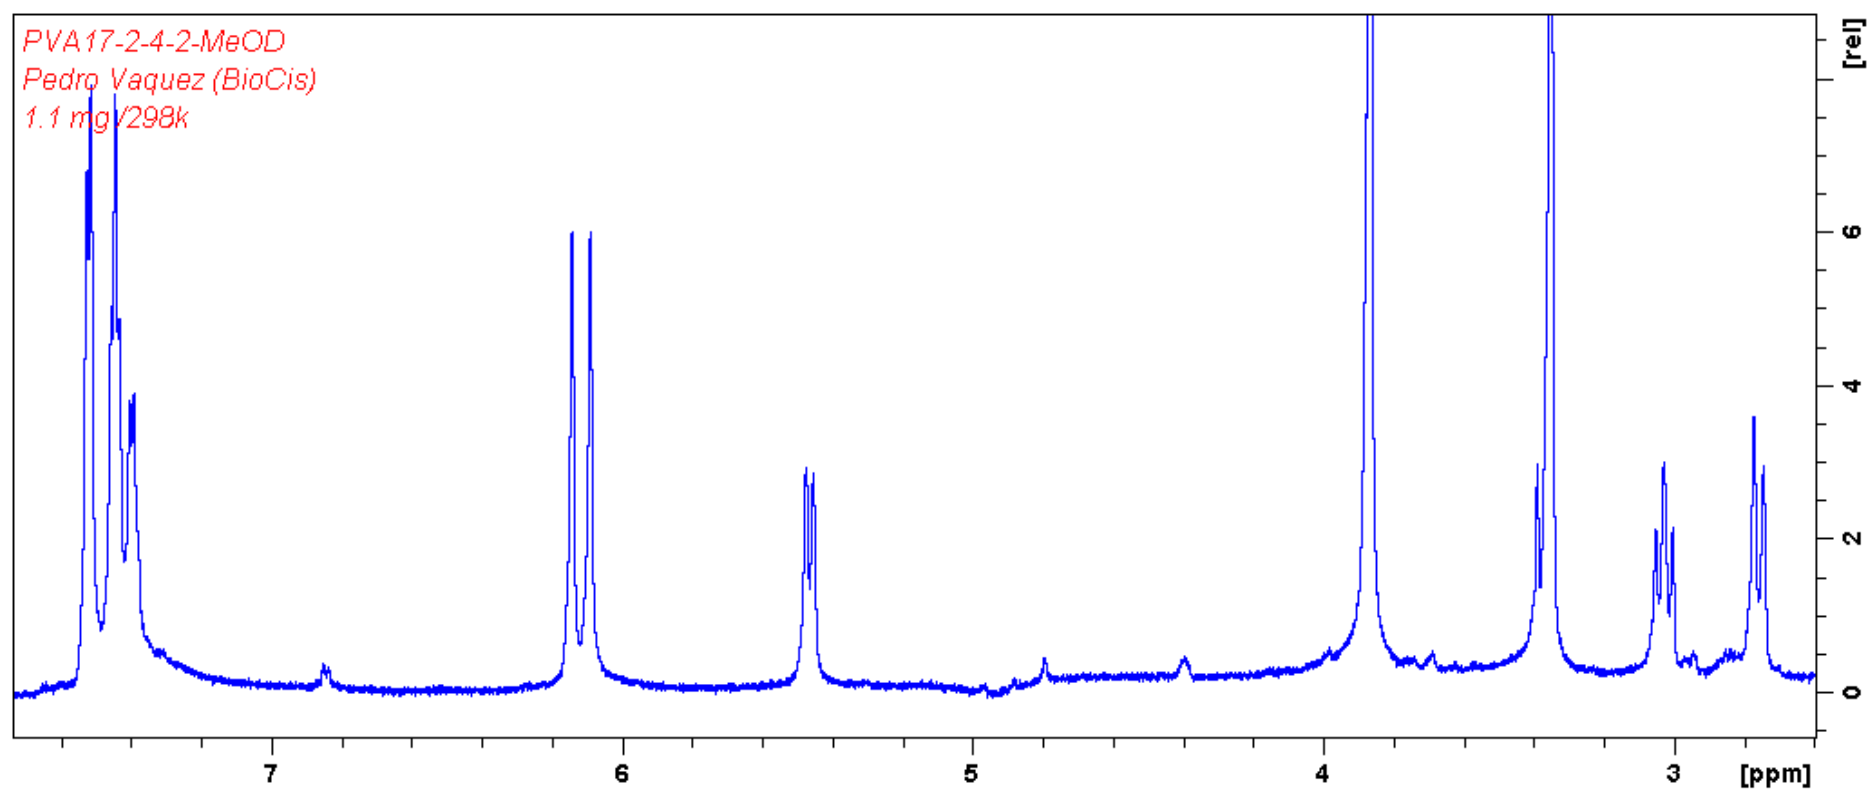

$^1\text{H}$  NMR for compound **8** in  $\text{CD}_3\text{OD}$

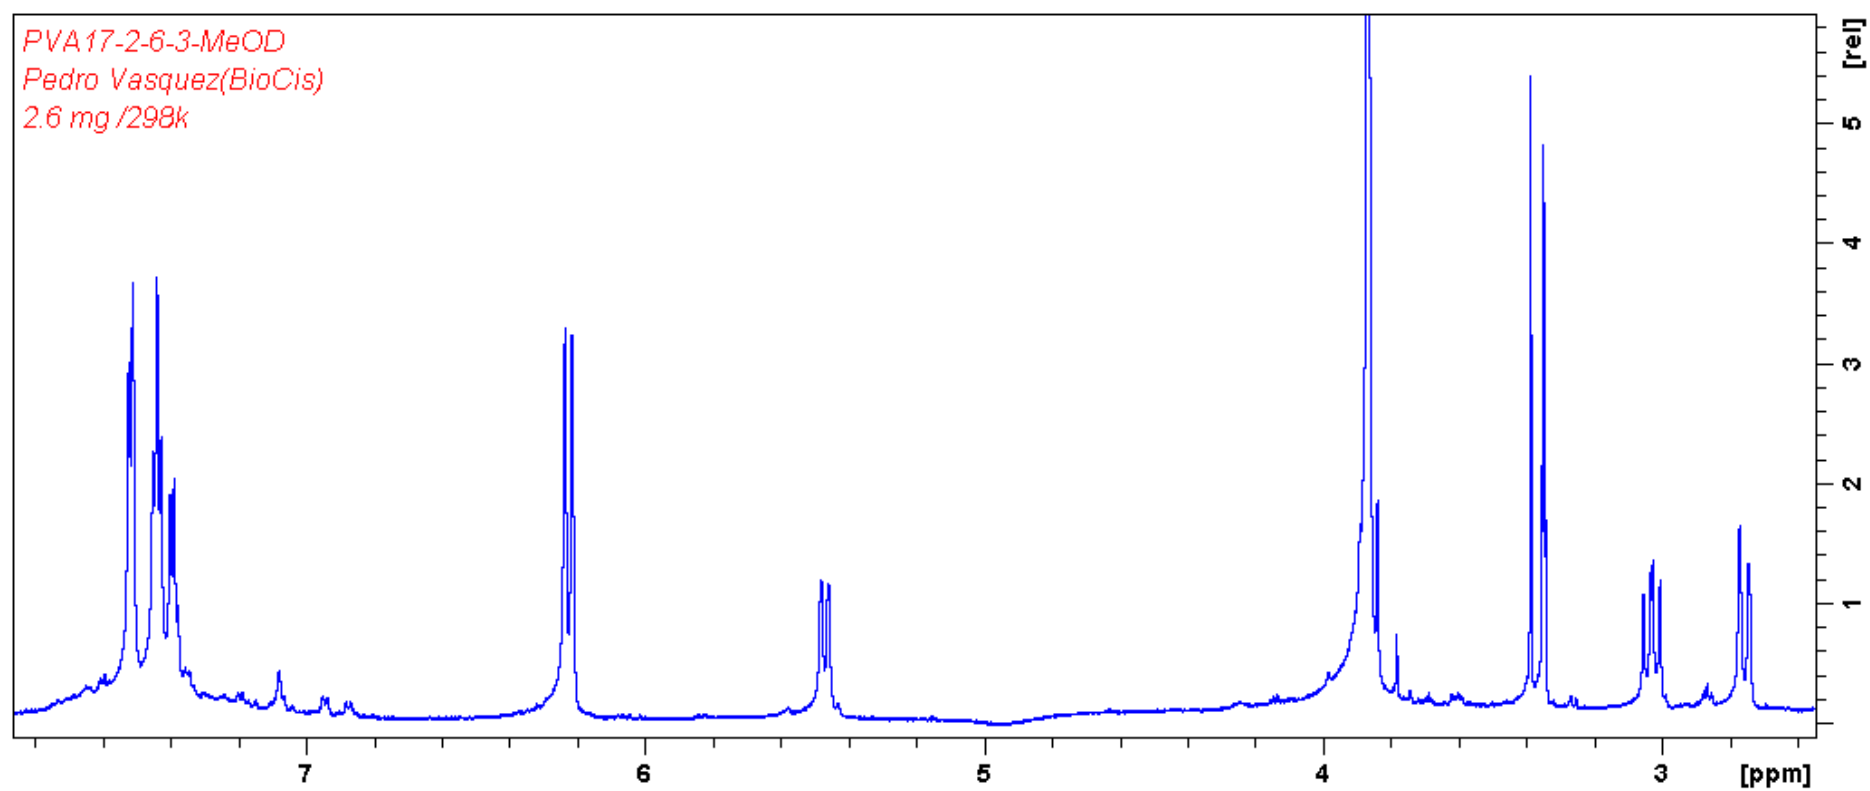

$^1\text{H}$  NMR for compound **9** in  $\text{CD}_3\text{OD}$

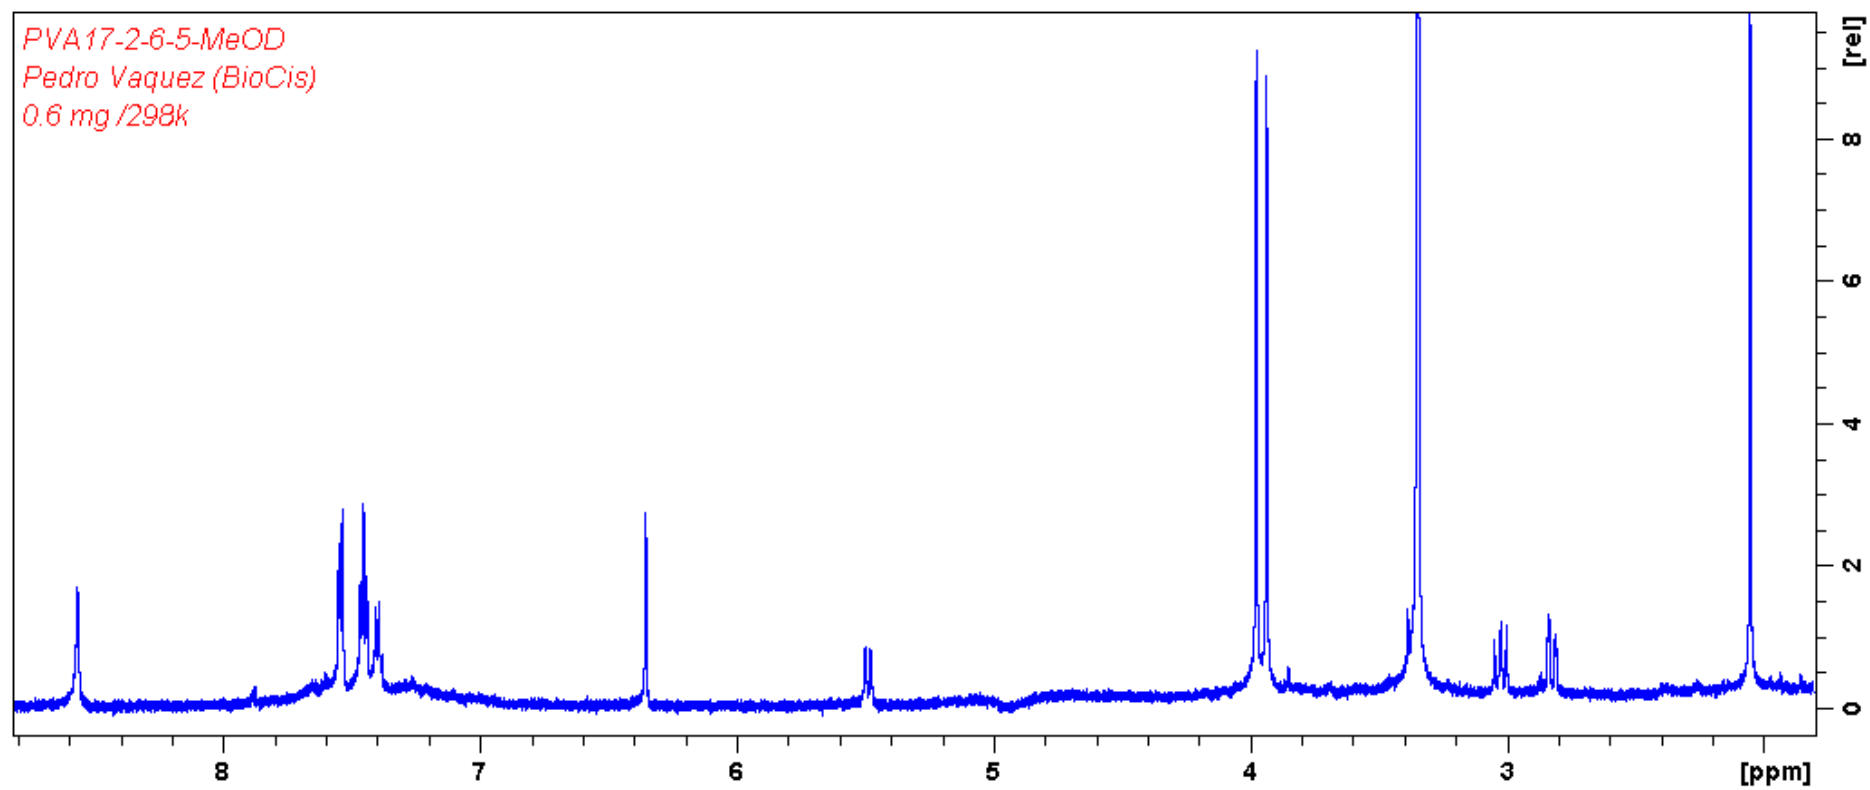



$^1\text{H}$  NMR for compound **11** in  $\text{CD}_3\text{OD}$

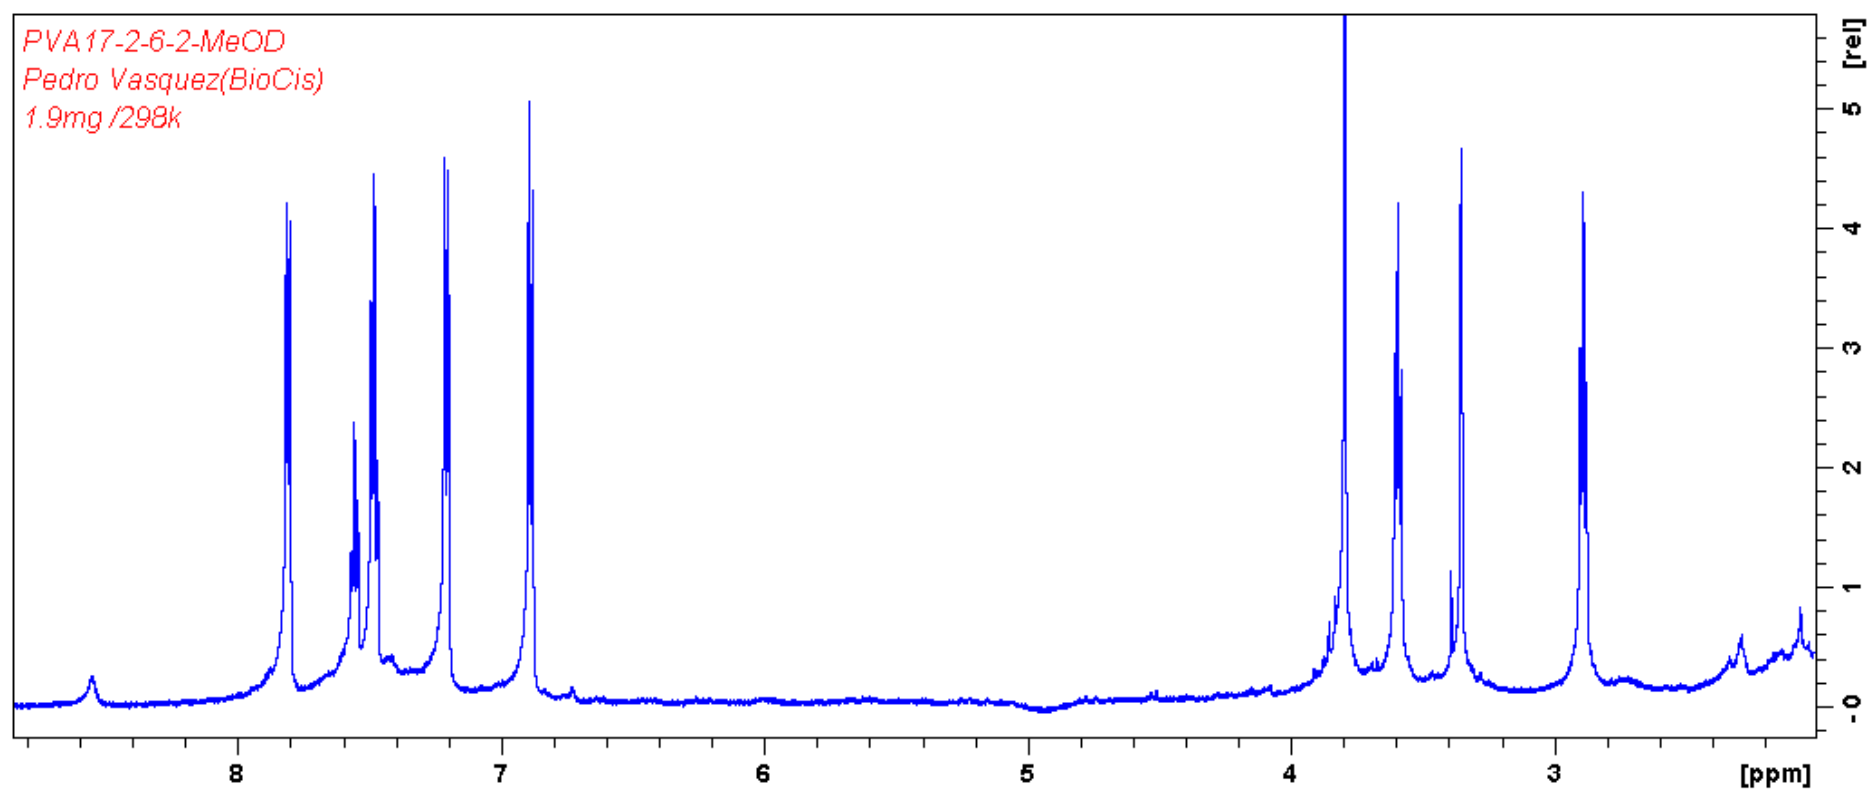

$^1\text{H}$  NMR for compound **12** in  $\text{CD}_3\text{OD}$

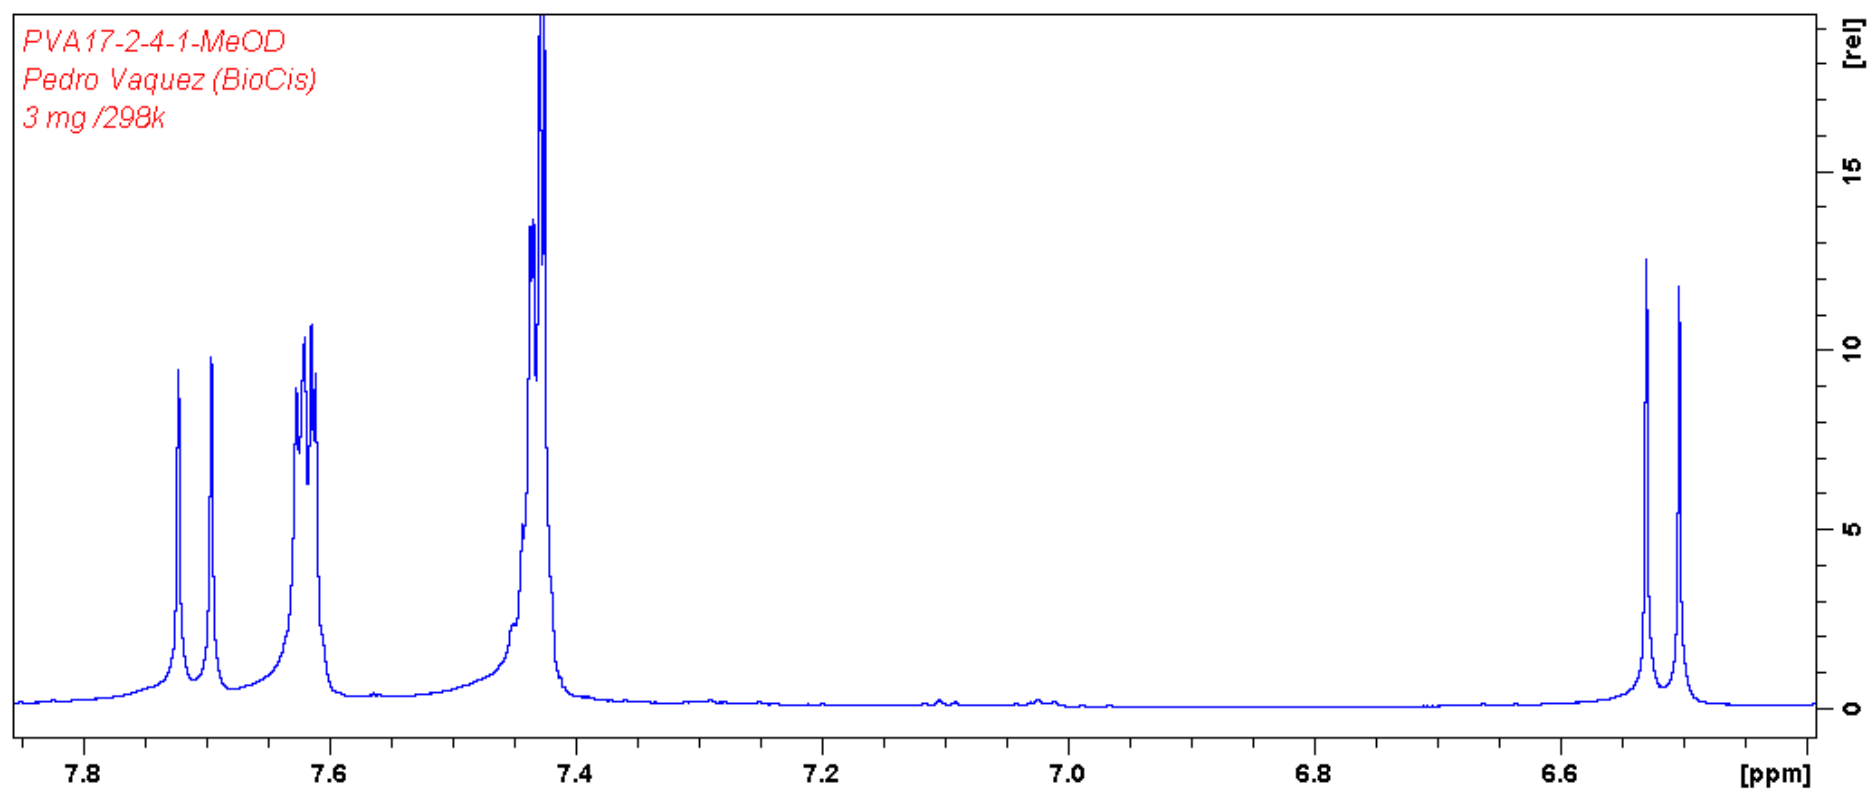

SI 8. 1D and 2D NMR for compound **10**

Figure S8. 1D and 2D NMR for compound **10**

$^1\text{H}$  NMR for compound **10** in  $\text{CD}_3\text{OD}$

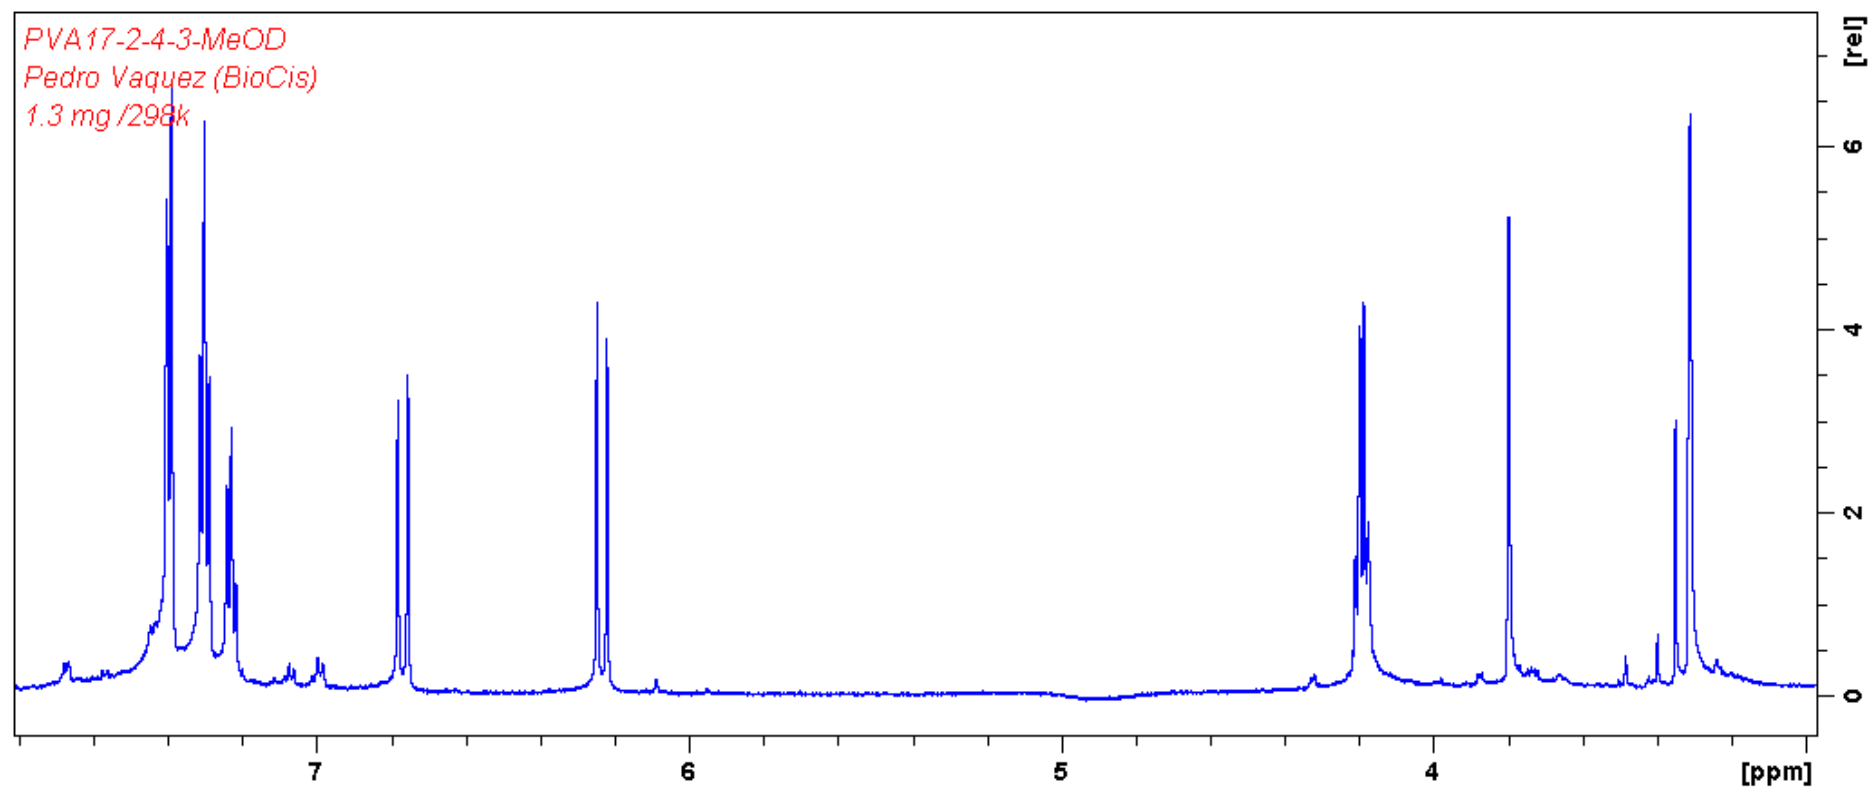

COSY spectrum for compound 10

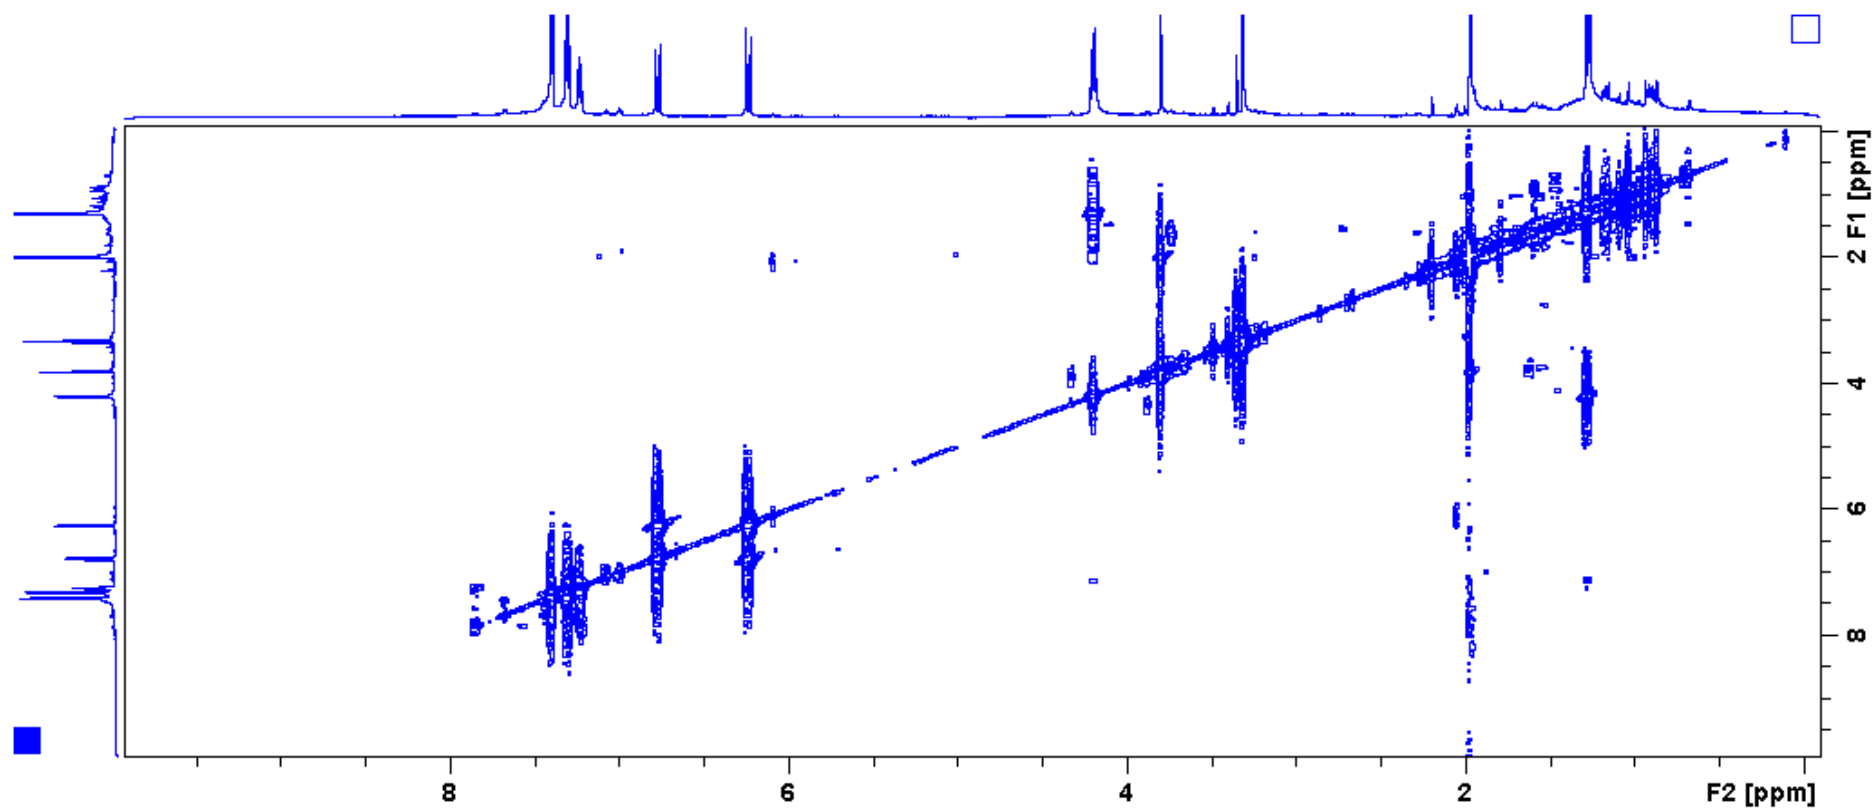

HSQC spectrum for compound **10**

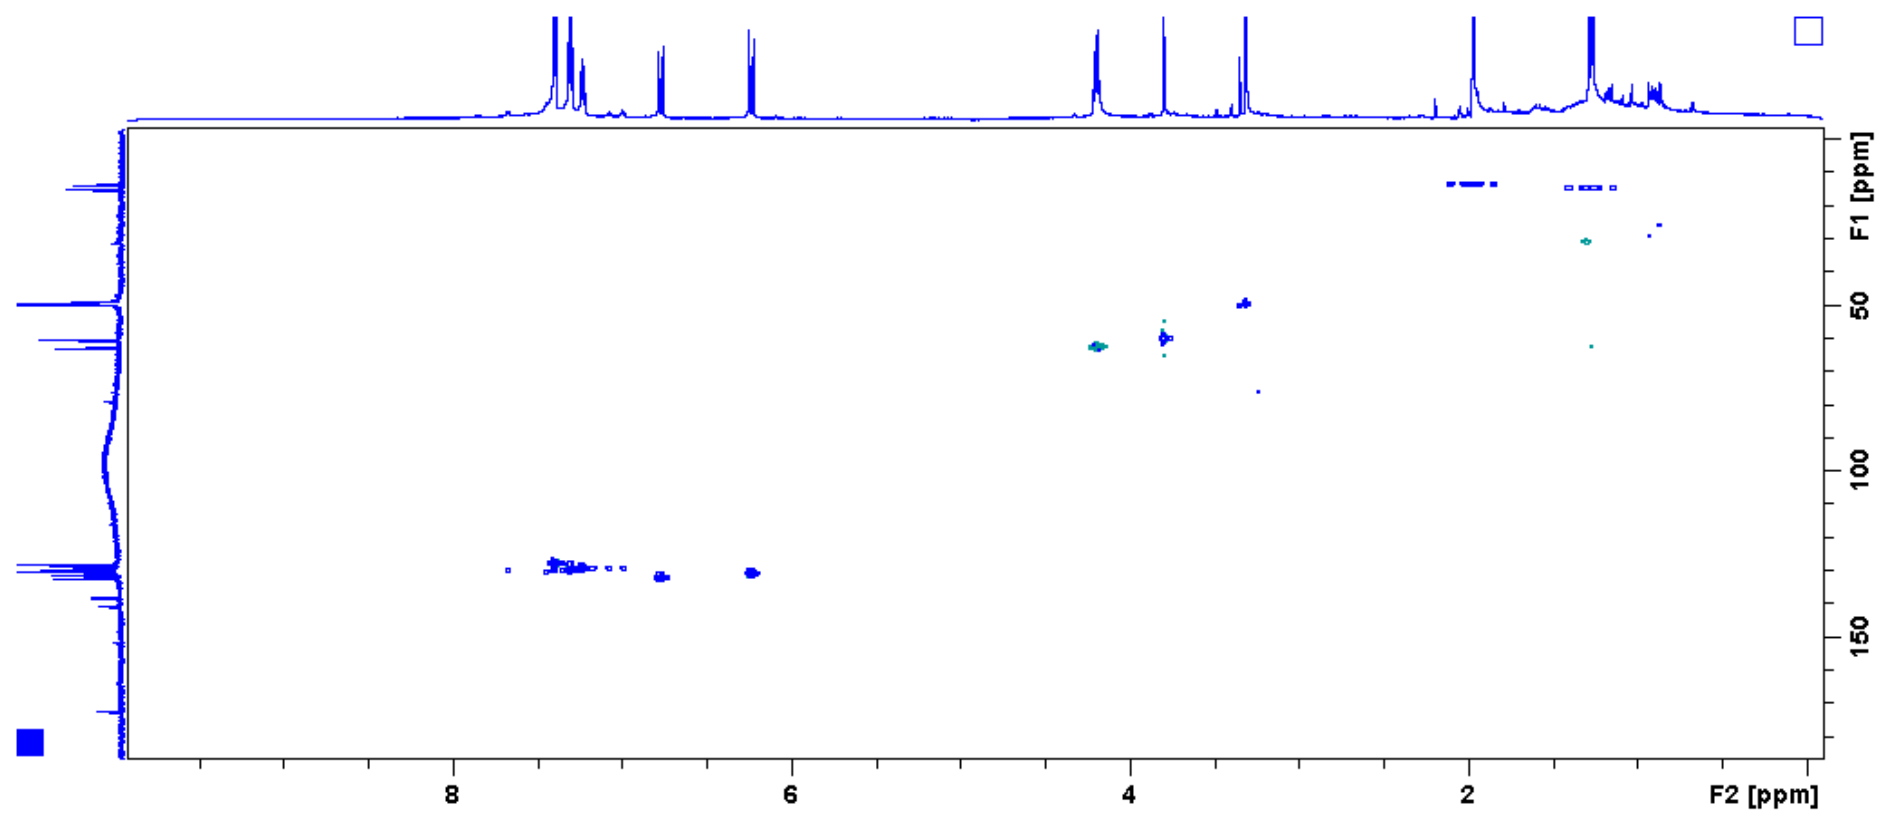

HMBC spectrum for compound 10

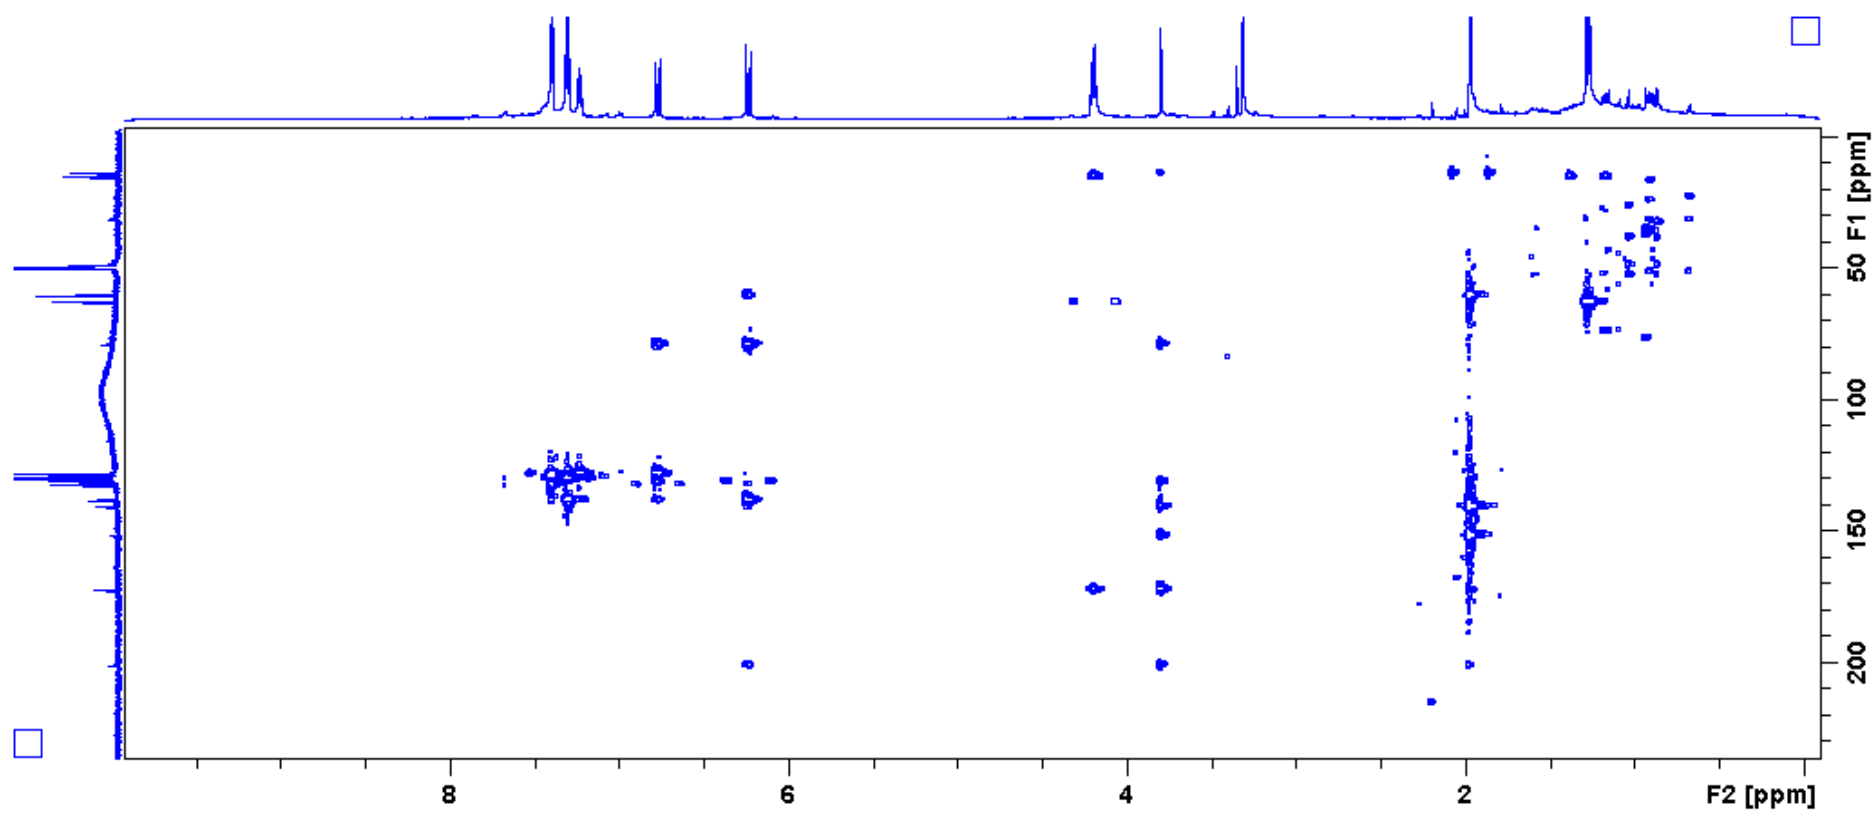

$^{13}\text{C}$  NMR spectrum for compound **10**

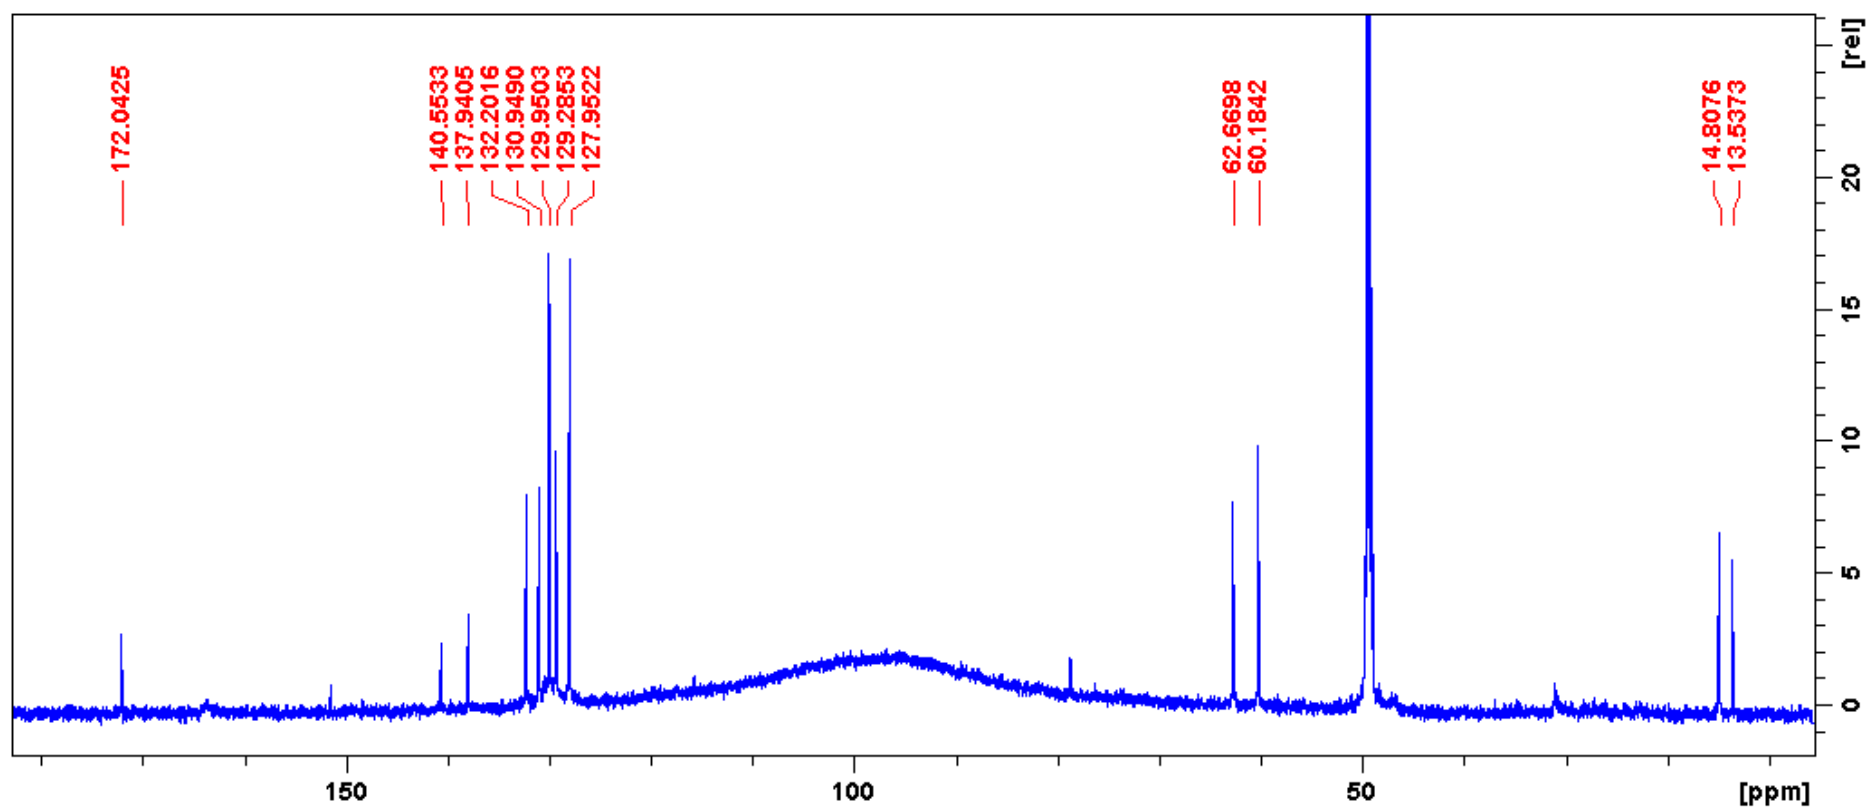

SI 9. NMR spectroscopic data for isolated compounds

Table S1. NMR spectroscopic data for isolated compounds

NMR spectroscopic data for flavanones **4-9**.

| Position              | 4                                                   |                     | 5                                                   |                     | 6                                                   |                     | 7                                                   |                     | 8                                                   |                     | 9                                                   |                     |
|-----------------------|-----------------------------------------------------|---------------------|-----------------------------------------------------|---------------------|-----------------------------------------------------|---------------------|-----------------------------------------------------|---------------------|-----------------------------------------------------|---------------------|-----------------------------------------------------|---------------------|
|                       | $\delta_{\text{H}}$ , mult.<br>( <i>J</i> in Hz)    | $\delta_{\text{C}}$ | $\delta_{\text{H}}$ , mult.<br>( <i>J</i> in Hz)    | $\delta_{\text{C}}$ | $\delta_{\text{H}}$ , mult.<br>( <i>J</i> in Hz)    | $\delta_{\text{C}}$ | $\delta_{\text{H}}$ , mult.<br>( <i>J</i> in Hz)    | $\delta_{\text{C}}$ | $\delta_{\text{H}}$ , mult.<br>( <i>J</i> in Hz)    | $\delta_{\text{C}}$ | $\delta_{\text{H}}$ , mult.<br>( <i>J</i> in Hz)    | $\delta_{\text{C}}$ |
| <b>1</b>              |                                                     |                     |                                                     |                     |                                                     |                     |                                                     |                     |                                                     |                     |                                                     |                     |
| <b>2</b>              | 5.51, dd (2.8, 12.7)                                | 80.2                | 5.52, dd (3.1, 12.7)                                | 79.6                | 5.39, dd (2.9, 12.9)                                | 78.9                | 5.46, dd (2.4, 12.6)                                | 80.5                | 5.47, dd (1.9, 13.0)                                | 80.4                | 5.49, dd (2.3, 12.6)                                | 80.2                |
| <b>3</b>              | a) 3.14, dd (12.7, 17.2)<br>b) 2.83, dd (3.2, 17.1) | 43.6                | a) 3.15, dd (12.7, 17.1)<br>b) 2.89, dd (3.1, 17.1) | 43.7                | b) 3.02, dd (13.0, 17.1)<br>a) 2.83, dd (3.1, 17.0) | 43.7                | a) 3.02, dd (13.0, 16.4)<br>b) 2.76, dd (2.3, 16.3) | 46.6                | a) 3.03, dd (13.0, 16.6)<br>b) 2.76, dd (2.2, 16.6) | 46.5                | a) 3.03, dd (12.7, 16.9)<br>b) 2.83, dd (2.5, 16.3) | 46.8                |
| <b>4</b>              |                                                     | 197.7               |                                                     | 199.1               |                                                     | 196.6               |                                                     | 191.9               |                                                     | 191.9               |                                                     | 192.9               |
| <b>4a</b>             |                                                     | 103.7               |                                                     | 105.9               |                                                     | 103.1               |                                                     | 106.1               |                                                     | 106.7               |                                                     | 106.4               |
| <b>5</b>              |                                                     | 161.2               |                                                     | 160.0               |                                                     | 159.4               |                                                     | 164.6               |                                                     | 163.9               |                                                     | 166.0               |
| <b>6</b>              |                                                     | 106.2               |                                                     | 111.8               |                                                     | 102.4               | 6.14, s                                             | 94.6                | 6.23, d (1.8)                                       | 94.0                | 6.36, s                                             | 90.0                |
| <b>7</b>              |                                                     | 166.8               |                                                     | 166.2               |                                                     | 161.1               |                                                     | 167.2               |                                                     | 168.4               |                                                     | 162.4               |
| <b>8</b>              | 6.17, s                                             | 91.9                |                                                     | 110.5               |                                                     | 103.2               | 6.09, s                                             | 97.4                | 6.24, d (1.8)                                       | 95.1                |                                                     | 107.2               |
| <b>8a</b>             |                                                     | 162.5               |                                                     | 159.0               |                                                     | 157.8               |                                                     | 166.5               |                                                     | 166.8               |                                                     | 159.5               |
| <b>1'</b>             |                                                     | 140.0               |                                                     | 140.1               |                                                     | 139.0               |                                                     | 140.9               |                                                     | 140.5               |                                                     | 141.1               |
| <b>2'</b>             | 7.51, d (6.8)                                       | 127.4               | 7.52, d (7.4)                                       | 127.3               | 7.45, d (7.1)                                       | 126.1               | 7.52, d (7.2)                                       | 127.4               | 7.51, d (7.3)                                       | 127.4               | 7.55, d (7.9)                                       | 127.3               |
| <b>3'</b>             | 7.44, t (7.2)                                       | 129.7               | 7.44, t (7.5)                                       | 129.7               | 7.42, dd (7.5)                                      | 129.0               | 7.44, t (7.0)                                       | 129.8               | 7.44, t (7.4)                                       | 129.8               | 7.46, t (7.5)                                       | 130.0               |
| <b>4'</b>             | 7.39, t (7.1)                                       | 129.7               | 7.39, t (7.3)                                       | 129.6               | 7.36, dd (7.1)                                      | 128.6               | 7.40, t (7.3)                                       | 129.6               | 7.39, t (7.1)                                       | 129.7               | 7.40, t (7.1)                                       | 129.7               |
| <b>5'</b>             | 7.44, t (7.2)                                       | 129.7               | 7.44, t (7.5)                                       | 129.7               | 7.42, dd (7.5)                                      | 129.0               | 7.44, t (7.0)                                       | 129.8               | 7.44, t (7.4)                                       | 129.8               | 7.46, t (7.5)                                       | 130.0               |
| <b>6'</b>             | 7.51, d (6.7)                                       | 127.4               | 7.52, d (7.4)                                       | 127.3               | 7.45, d (7.1)                                       | 126.1               | 7.52, d (7.2)                                       | 127.4               | 7.51, d (7.3)                                       | 127.4               | 7.55, d (7.9)                                       | 127.3               |
| <b>O-CH3</b>          | 3.84, s                                             | 7) 56.9             | 7) 3.72, s                                          | 60.8                |                                                     |                     | 5) 3.86, s                                          | 56.4                | 5) 3.869, s<br>7) 3.867, s                          | 56.5<br>56.5        | 5) 3.98, s<br>7) 3.94, s                            | -56.5<br>-56.4      |
| <b>OH</b>             | 12.17, s                                            |                     | 5) 12.12                                            |                     | 5) 12.25, s                                         |                     |                                                     |                     |                                                     |                     |                                                     |                     |
| <b>CH<sub>3</sub></b> | 1.94, s                                             | 6) 7.1              | 6) 2.04, s<br>8) 2.04, s                            | 8.6<br>8.1          | 6) 2.060, s<br>8) 2.055, s                          | 6) 7.2<br>8) 7.7    |                                                     |                     |                                                     |                     | 2.06, s                                             | 8) 8.2              |



NMR spectroscopic data for chalcones **1-3**.

| Position                   | 1                                                             |                                  | 2                                                             |                                  | 3                                                             |                                  |
|----------------------------|---------------------------------------------------------------|----------------------------------|---------------------------------------------------------------|----------------------------------|---------------------------------------------------------------|----------------------------------|
|                            | $\delta_{\text{H}}$ , mult.<br>( <i>J</i> in Hz) <sup>a</sup> | $\delta_{\text{C}}$ <sup>a</sup> | $\delta_{\text{H}}$ , mult.<br>( <i>J</i> in Hz) <sup>b</sup> | $\delta_{\text{C}}$ <sup>b</sup> | $\delta_{\text{H}}$ , mult.<br>( <i>J</i> in Hz) <sup>c</sup> | $\delta_{\text{C}}$ <sup>c</sup> |
| <b>1</b>                   |                                                               | 135.4                            |                                                               | 135.3                            |                                                               | 137.3                            |
| <b>2</b>                   | 7.70, dd (1.9, 7.8)                                           | 128.4                            | 7.63, d (6.5)                                                 | 128.5                            | 7.68, d (6.3)                                                 | 129.6                            |
| <b>3</b>                   | 7.43, m                                                       | 130.2                            | 7.40 m                                                        | 129.0                            | 7.45, m                                                       | 131.5                            |
| <b>4</b>                   | 7.44, m                                                       | 129.0                            | 7.40 m                                                        | 130.3                            | 7.47, m                                                       | 130.3                            |
| <b>5</b>                   | 7.43, m                                                       | 130.2                            | 7.40 m                                                        | 129.0                            | 7.45, m                                                       | 131.5                            |
| <b>6</b>                   | 7.70, m                                                       | 128.4                            | 7.63, d (6.5)                                                 | 128.5                            | 7.68, d (6.3)                                                 | 129.6                            |
| <b><math>\alpha</math></b> | 7.97, d (15.6)                                                | 128.0                            | 7.95, d (15.5)                                                | 126.4                            | 7.96, d (15.6)                                                | 129.3                            |
| <b><math>\beta</math></b>  | 7.74, d (15.6)                                                | 141.6                            | 7.82, d (15.5)                                                | 143.2                            | 7.74, d (15.6)                                                | 143.2                            |
| <b>9</b>                   |                                                               | 193.1                            |                                                               | 194.2                            |                                                               | 193.1                            |
| <b>1'</b>                  |                                                               | 105.8                            |                                                               | 109.7                            |                                                               | 107.0                            |
| <b>2'</b>                  |                                                               | 163.8                            |                                                               | 162.5                            |                                                               | 169.1                            |
| <b>3'</b>                  |                                                               | 104.9                            |                                                               | 110.2                            | 5.98, d (2.2)                                                 | 97.4                             |
| <b>4'</b>                  |                                                               | 164.1                            |                                                               | 160.7                            |                                                               | 167.1                            |
| <b>5'</b>                  | 6.21, s                                                       | 87.2                             | 6.23, s                                                       | 99.8                             | 6.06, d (2.0)                                                 | 92.8                             |
| <b>6'</b>                  |                                                               | 161.6                            |                                                               | 161.4                            |                                                               | 165.1                            |
| <b>O-CH<sub>3</sub></b>    | 4) 3.92, s<br>6) 3.99, s                                      | -55.6<br>-55.9                   | 6') 3.66, s                                                   | 62.3                             | 6') 3.97, s                                                   | 56.7                             |
| <b>OH</b>                  | 2') 14.03                                                     | 163.8                            | 2') OH<br>4') OH                                              | 162.5<br>160.7                   | 2') OH<br>4') OH                                              | 169.1<br>167.1                   |
| <b>CH<sub>3</sub></b>      | 3') 1.96, s                                                   | 6.5                              | 2.1, s                                                        | 8.1                              | -                                                             |                                  |

NMR spectroscopic data for compound **12**

| Position | 12                                                         |                                  |
|----------|------------------------------------------------------------|----------------------------------|
|          | $\delta_{\text{H}}$ , mult. ( <i>J</i> in Hz) <sup>a</sup> | $\delta_{\text{C}}$ <sup>a</sup> |
| <b>1</b> |                                                            | 170.7                            |
| <b>2</b> | 6.52, d (16.0)                                             | 119.6                            |
| <b>3</b> | 7.71, d (16.0)                                             | 146.6                            |
| <b>4</b> |                                                            | 136.1                            |
| <b>5</b> | 7.62, dd (7.6, 4.1)                                        | 129.5                            |
| <b>6</b> | 7.43, dd (4.8, 1.6)                                        | 130.3                            |
| <b>7</b> | 7.62, dd (7.6, 4.1)                                        | 129.5                            |
| <b>8</b> | 7.43, dd (5.18)                                            | 131.7                            |
| <b>9</b> |                                                            | 136.1                            |

NMR spectroscopic data for compound **10**

| Position  | <b>10</b>                                     |                     |
|-----------|-----------------------------------------------|---------------------|
|           | $\delta_{\text{H}}$ , mult. ( <i>J</i> in Hz) | $\delta_{\text{C}}$ |
| <b>1</b>  |                                               | 137.8               |
| <b>2</b>  | 7.40, d (7.7)                                 | 127.9               |
| <b>3</b>  | 7.30, dd (7.7, 7.4)                           | 129.9               |
| <b>4</b>  | 7.23, t (7.4, 7.1)                            | 129.2               |
| <b>5</b>  | 7.30, dd (7.7, 7.4)                           | 129.9               |
| <b>6</b>  | 7.40, dd (7.7)                                | 127.9               |
| <b>7</b>  | 6.77, d (15.9)                                | 132.1               |
| <b>8</b>  | 6.23, d (15.9)                                | 130.9               |
| <b>9</b>  |                                               | 200.8               |
| <b>2'</b> |                                               | 151.3               |
| <b>3'</b> |                                               | 140.4               |
| <b>4'</b> | 3.80, s                                       | 60.0                |
| <b>5'</b> |                                               | 78.6                |
| <b>6'</b> |                                               | 171.9               |
| <b>7'</b> | 4.19, m                                       | 62.5                |
| <b>8'</b> | 1.27, t (7.1)                                 | 14.9                |
| <b>9'</b> | 1.97; s                                       | 13.5                |

NMR spectroscopic data for compound **11**

| Position                | <b>11</b>                                     |                     |
|-------------------------|-----------------------------------------------|---------------------|
|                         | $\delta_{\text{H}}$ , mult. ( <i>J</i> in Hz) | $\delta_{\text{C}}$ |
| <b>1</b>                |                                               | 170.5               |
| <b>2</b>                |                                               | 136.1               |
| <b>3</b>                | 7.81, d (7.2)                                 | 128.5               |
| <b>4</b>                | 7.48, t (7.6)                                 | 129.8               |
| <b>5</b>                | 7.55, dd (7.3, 7.4)                           | 132.9               |
| <b>6</b>                | 7.48, dd (7.6)                                | 129.8               |
| <b>7</b>                | 7.81, d (7.2)                                 | 128.5               |
| <b>8</b>                | NH                                            |                     |
| <b>9</b>                | 3.59, t (7.4)                                 | 43.2                |
| <b>10</b>               | 2.89, t (7.3)                                 | 36.0                |
| <b>11</b>               |                                               | 132.9               |
| <b>12</b>               | 7.21, d (8.5)                                 | 131.1               |
| <b>13</b>               | 6.88, d (8.6)                                 | 115.2               |
| <b>14</b>               |                                               | 160.0               |
| <b>15</b>               | 6.88, d (8.6)                                 | 115.2               |
| <b>16</b>               | 7.21, d (8.5)                                 | 131.1               |
| <b>O-CH<sub>3</sub></b> | 14) 3.79, s                                   | 55.8                |

SI 10. LCMS of compounds isolated from *P. coruscans*.

Figure S9. LCMS of compounds isolated from *P. coruscans*.

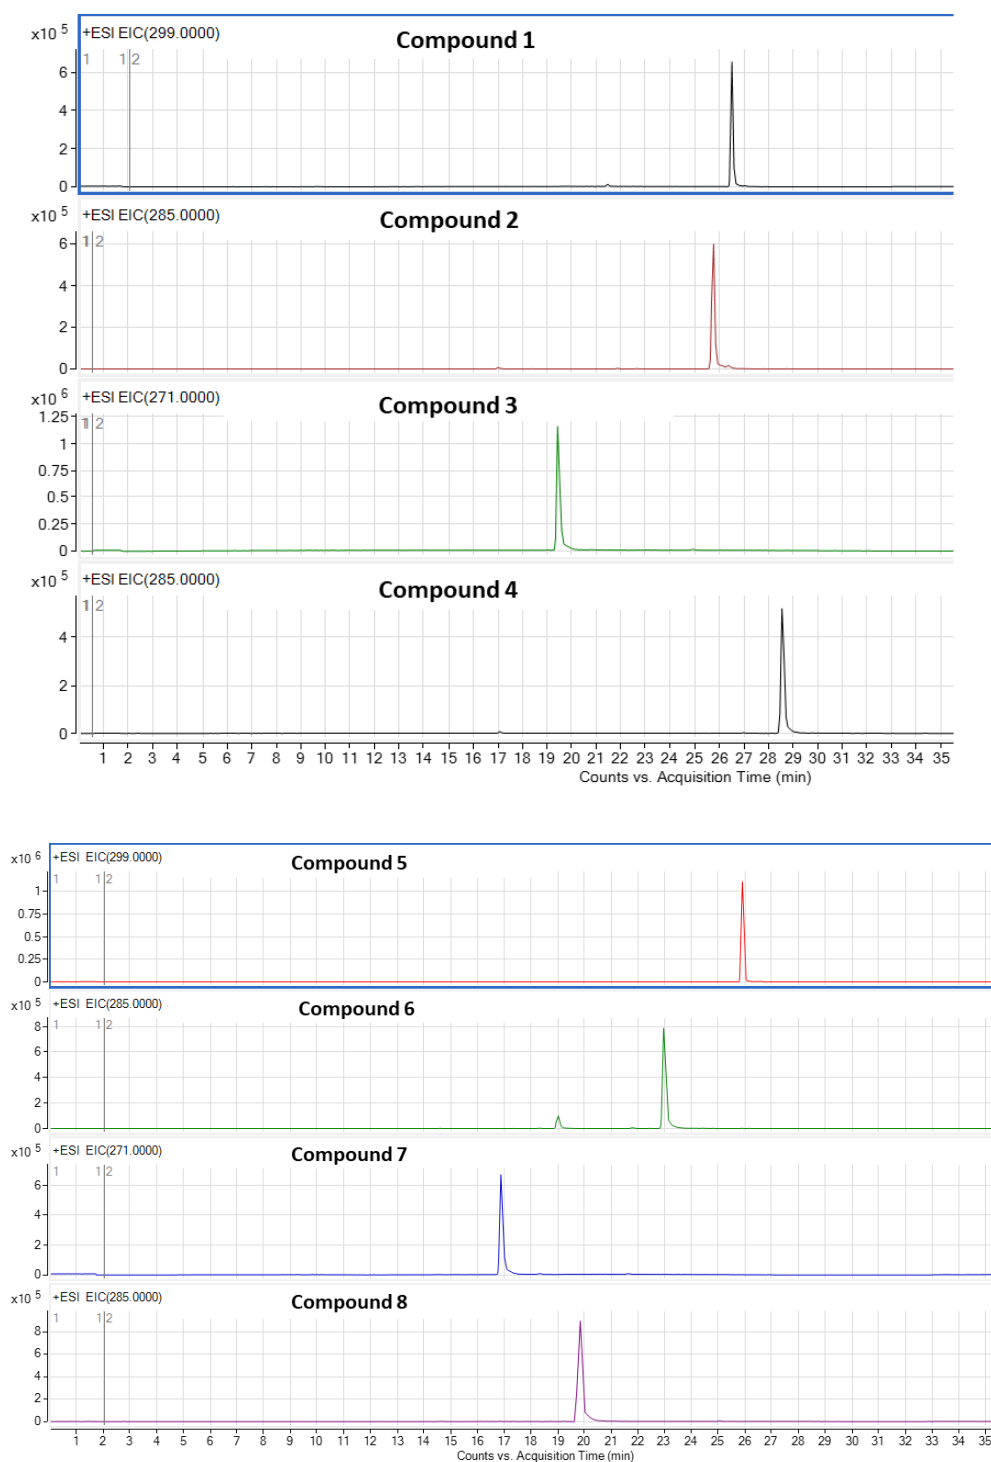

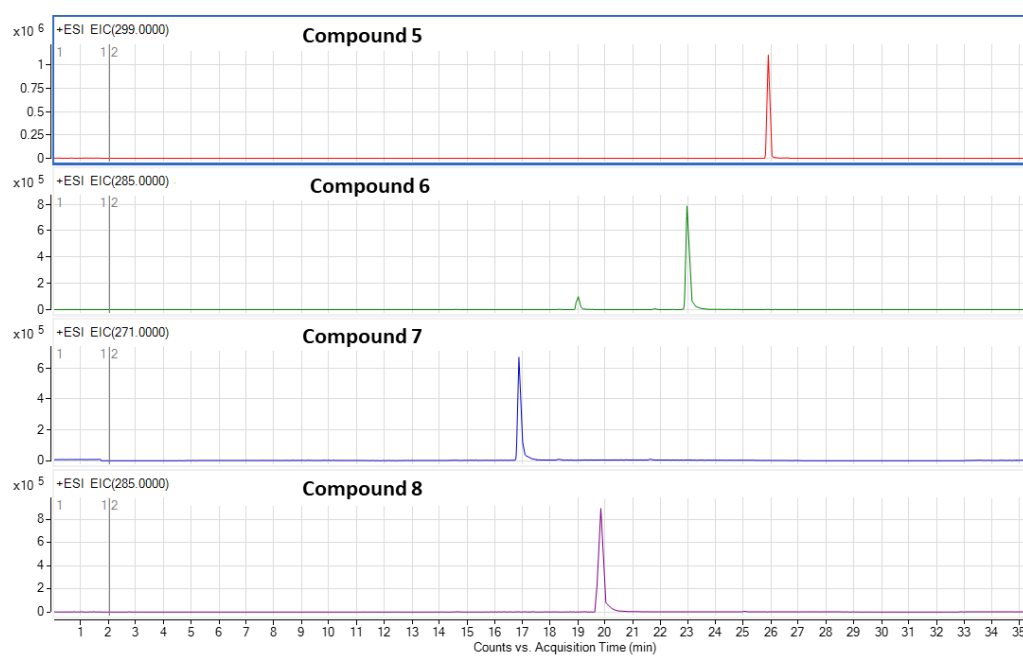

SI 11. Structures of antimalarial drugs

Figure S10. Structures of antimalarial drugs

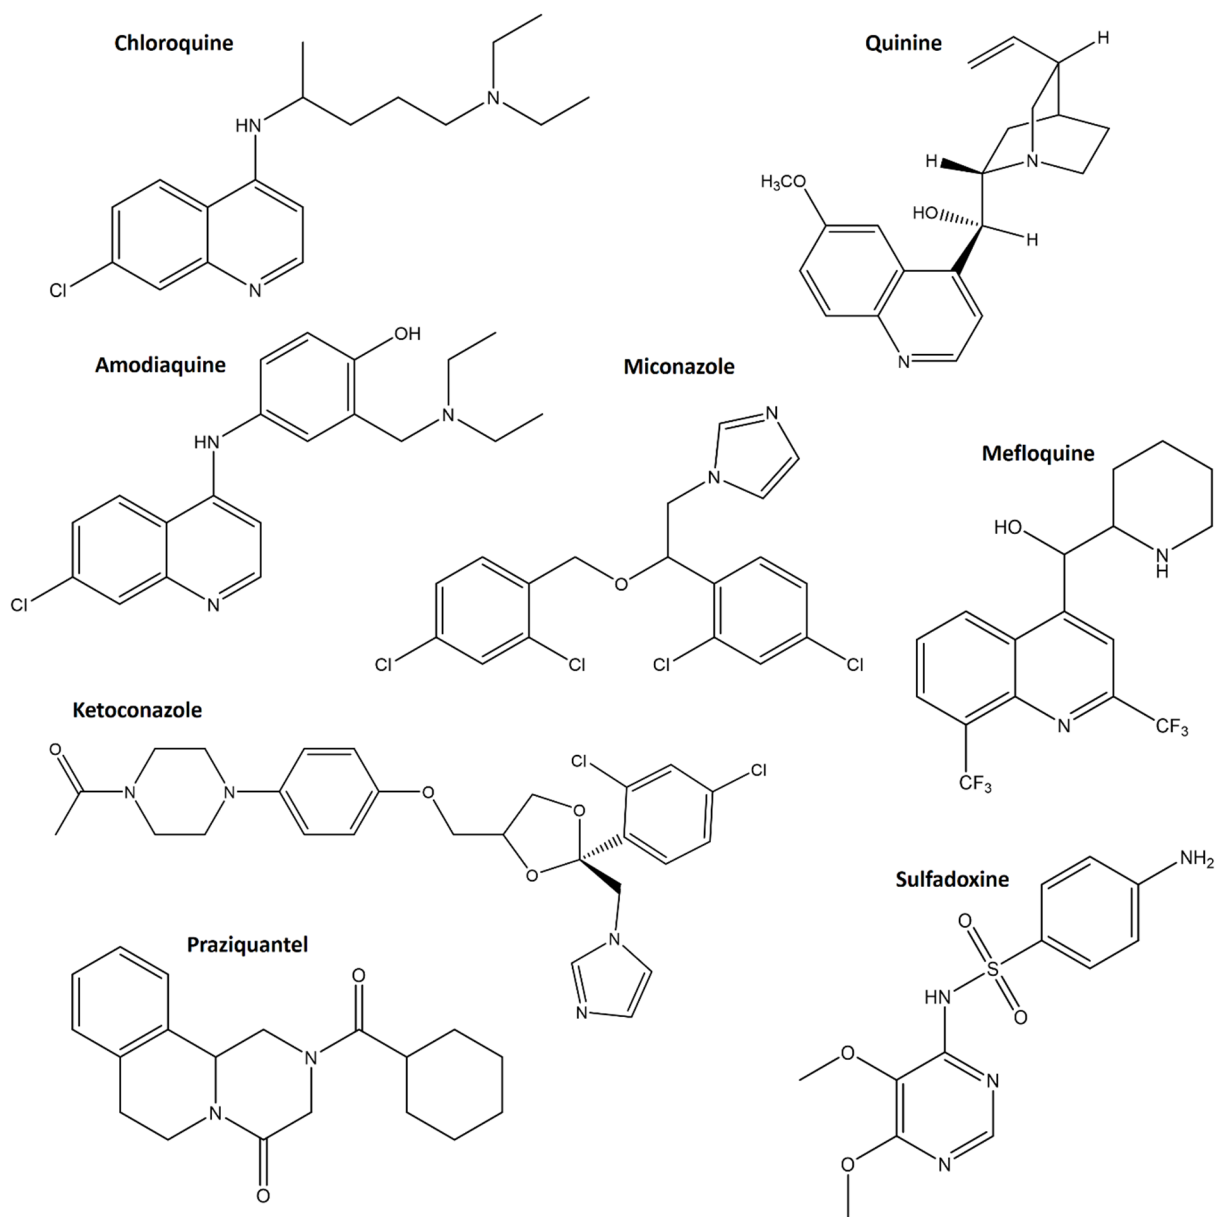

SI 12. Structures of alkaloids from *C. pubescens*

Figure S11. Structures of alkaloids from *C. pubescens*

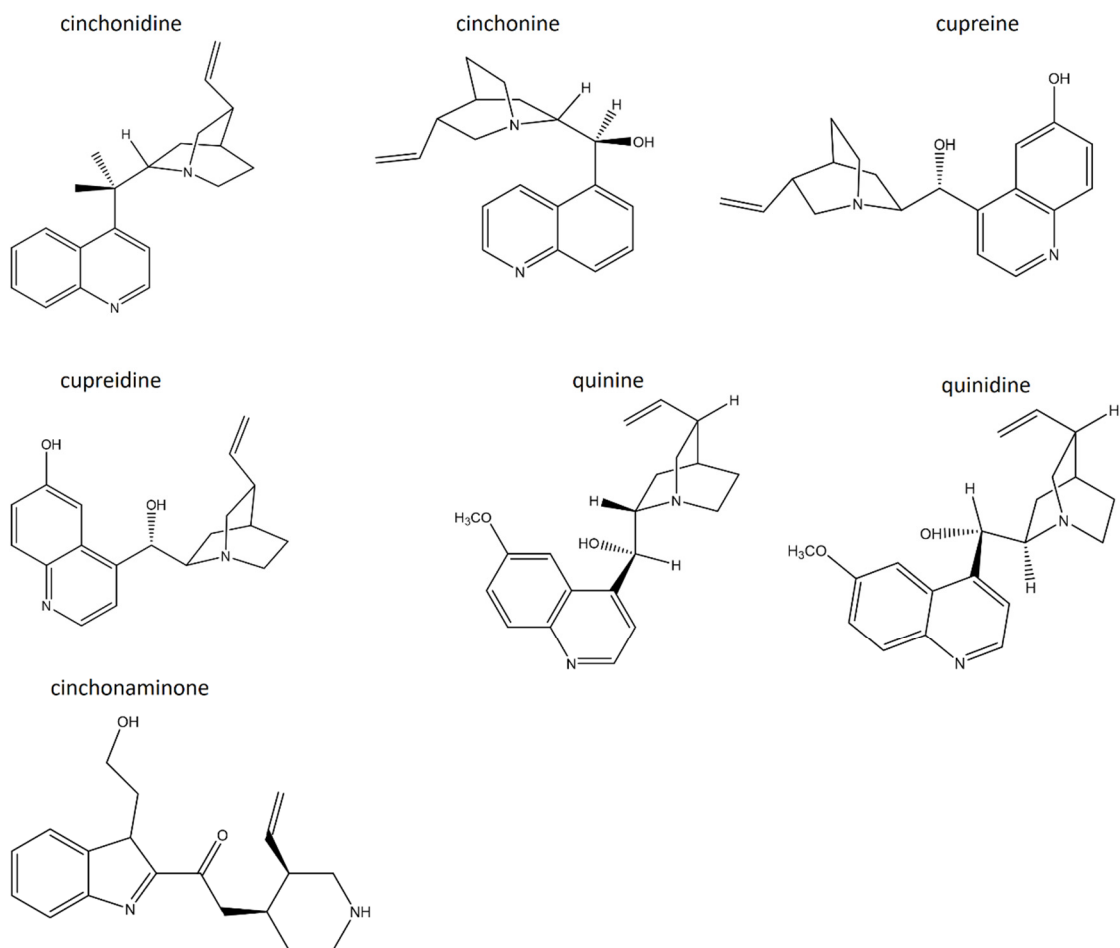

## SI 13. References

1. Muñoz-Durango, K.; Maciuk, A.; Harfouche, A.; Torijano-Gutiérrez, S.; Jullian, J.-C.; Quintin, J.; Spelman, K.; Mouray, E.; Grellier, P.; Figadère, B. Detection, Characterization, and Screening of Heme-Binding Molecules by Mass Spectrometry for Malaria Drug Discovery. *Anal. Chem.* **2012**, *84*, 3324–3329, doi:10.1021/ac300065t.
2. Adityachaudhury, N.; Das, A.K.; Choudhury, A.; Daskanungo, P.L. Aurentiacin, a New Chalcone from *Didymocarpus Aurentiaca*. *Phytochemistry* **1976**, *15*, 229–230, doi:10.1016/S0031-9422(00)89099-8.
3. Resurreccion-Magno, Ma.H.C.; Villaseñor, I.M.; Harada, N.; Monde, K. Antihyperglycaemic Flavonoids from *Syzygium Samarangense* (Blume) Merr. and Perry. *Phytother. Res.* **2005**, *19*, 246–251, doi:10.1002/ptr.1658.
4. Harborne, J.B.; Baxter, H. *The Handbook of Natural Flavonoids. Volume 1 and Volume 2*; John Wiley and Sons, 1999; ISBN 978-0-471-95893-2.
5. Xiao, H.; Rao Ravu, R.; Tekwani, B.L.; Li, W.; Liu, W.-B.; Jacob, M.R.; Khan, S.I.; Cai, X.; Peng, C.-Y.; Khan, I.A.; et al. Biological Evaluation of Phytoconstituents from *Polygonum Hydropiper*. *Nat. Prod. Res.* **2017**, *31*, 2053–2057, doi:10.1080/14786419.2016.1269094.
6. Wollenweber, E.; Dietz, V.H.; Schilling, G.; Favre-Bonvin, J.; Smith, D.M. Flavonoids from Chemotypes of the Goldback Fern, *Pityrogramma Triangularis*. *Phytochemistry* **1985**, *24*, 965–971, doi:10.1016/S0031-9422(00)83163-5.
7. P., P.; Díaz, D.; C., T.A.; Joseph-Nathan, P. A Chromene an Isoprenylated Methyl Hydroxybenzoate and a C-Methyl Flavanone from the Bark of *Piper Hostmannianum*. *Phytochemistry* **1987**, *26*, 809–811, doi:10.1016/S0031-9422(00)84792-5.
8. Basnet, P.; Kadota, S.; Shimizu, M.; Xu, H.-X.; Namba, T. 2'-Hydroxymatteucinol, a New C-Methyl Flavanone Derivative from *Matteucia Orientalis*; Potent Hypoglycemic Activity in Streptozotocin (STZ)-Induced Diabetic Rat. *Chem. Pharm. Bull. (Tokyo)* **1993**, *41*, 1790–1795, doi:10.1248/cpb.41.1790.
9. Itokawa, H.; Morita, M.; Mihashi, S. Phenolic Compounds from the Rhizomes of *Alpinia Speciosa*. *Phytochemistry* **1981**, *20*, 2503–2506, doi:10.1016/0031-9422(81)83082-8.
10. Bick, I.; Brown, R.; Hillis, W. Three Flavanones from Leaves of *Eucalyptus Sieberi*. *Aust. J. Chem.* **1972**, *25*, 449–451.
11. Mayer, R. A  $\beta$ -Hydroxychalcone from *Leptospermum Scoparium*. *Planta Med* **2007**, *59*, 269–271, doi:10.1055/s-2006-959667.
12. Niu, X.M.; Li, S.H.; Peng, L.Y.; Lin, Z.W.; Rao, G.X.; Sun, H.D. Constituents from *Limonia Crenulata*. *J. Asian Nat. Prod. Res.* **2001**, *3*, 299–311, doi:10.1080/10286020108040370.
13. Chatterjee, A.; Chakrabarty, M.; Kundu, A. Constituents of *Pleiospermium Alatum*: Alatamide and N-Benzoyltyramine Methyl Ether. *Aust. J. Chem.* **1975**, *28*, 457–460.
14. Di Iorio, N.; Filippini, G.; Mazzanti, A.; Righi, P.; Bencivenni, G. Controlling the C(Sp<sup>3</sup>)–C(Sp<sup>2</sup>) Axial Conformation in the Enantioselective Friedel–Crafts-Type Alkylation of  $\beta$ -Naphthols with Inden-1-Ones. *Org. Lett.* **2017**, *19*, 6692–6695, doi:10.1021/acs.orglett.7b03415.
15. Szmant, H.H.; Nanjundiah, R. Thiol-Olefin Cooxidation Reaction. 6. A New Convenient Route to 1-Substituted Indenes. Indenone as Dienophile in Diels–Alder Reactions. *J. Org. Chem.* **1978**, *43*, 1835–1837, doi:10.1021/jo00403a056.
